# Supplementary material for: Association between maternal vitamin D levels and risk of adverse pregnancy outcomes: a systematic review and dose–response meta-analysis
Source: Royal Society of Chemistry journal article supplement (doi:10.1039/d1fo03033g), 2021-12-03
Supplement: d1fo03033g1.pdf [file d1fo03033g1.pdf]

Supporting Information

---

**Association between maternal vitamin D levels and risk of adverse pregnancy**

**outcomes: a systematic review and dose-response meta-analysis**

Rui Zhao<sup>a</sup>, Leilei Zhou<sup>a</sup>, Shanshan Wang<sup>a</sup>, Guoping Xiong<sup>b</sup>, Liping Hao<sup>\*a</sup>

<sup>a</sup>Department of Nutrition and Food Hygiene, Hubei Key Laboratory of Food Nutrition and Safety and the Ministry of Education (MOE) Key Laboratory of Environment and Health, School of Public Health, Tongji Medical College, Huazhong University of Science and Technology, Wuhan, Hubei, China;

<sup>b</sup>The Central Hospital of Wuhan, Wuhan, Hubei, China.

**Short title:** Vitamin D and risk of adverse pregnancy outcomes.

**Corresponding author:**

Liping Hao, PhD

Department of Nutrition and Food Hygiene, Hubei Key Laboratory of Food Nutrition and Safety and the Ministry of Education (MOE) Key Laboratory of Environment and Health, School of Public Health, Tongji Medical College, Huazhong University of Science and Technology, Wuhan, China.

Tel.: +86-27-83650523.

Fax: 0086-27-83693307.

Email: haolp@mails.tjmu.edu.cn.

## Supporting Information

---

**Supplementary Table S1.** The PRISMA 2009 checklist.

**Supplementary Table S2.** Electronic search terms and strategy.

**Supplementary Table S3.** List of excluded studies along with reason.

**Supplementary Table S4.** Quality assessment of cohort studies based on the Newcastle Ottawa scale.

**Supplementary Table S5.** Quality assessment of nested case-control studies based on the Newcastle Ottawa scale.

**Supplementary Table S6.** Sensitivity analyses of maternal 25(OH)D levels and the risk of gestational diabetes mellitus.

**Supplementary Figure S1.** Non-linear dose-response meta-analysis of maternal 25(OH)D levels and risk of gestational diabetes mellitus.

**Supplementary Figure S2.** Linear dose-response meta-analysis of maternal 25(OH)D levels and risk of pre-eclampsia.

**Supplementary Figure S3.** Non-linear dose-response meta-analysis of maternal 25(OH)D levels and risk of gestational hypertension.

**Supplementary Figure S4.** Linear dose-response meta-analysis of maternal 25(OH)D levels and risk of gestational hypertension.

**Supplementary Figure S5.** Maternal 25(OH)D levels and risk of caesarean section, the highest versus lowest category.

**Supplementary Figure S6.** Non-linear dose-response meta-analysis of maternal 25(OH)D levels and risk of caesarean section.

**Supplementary Figure S7.** Linear dose-response meta-analysis of maternal 25(OH)D levels and risk of caesarean section.

**Supplementary Figure S8.** Funnel plot of the risk estimates for the association between maternal 25(OH)D levels and risk of gestational diabetes mellitus, the highest versus lowest category.

**Supplementary Figure S9.** Funnel plot of the risk estimates for the association between maternal 25(OH)D levels and risk of pre-eclampsia, the highest versus lowest category.

**Supplementary Figure S10.** Funnel plot of the risk estimates for the association between maternal 25(OH)D levels and risk of gestational hypertension, the highest versus lowest category.

**Supplementary Figure S11.** Funnel plot of the risk estimates for the association between maternal 25(OH)D levels and risk of caesarean section, the highest versus lowest category.

## Supporting Information

**Supplementary Table S1. The PRISMA 2009 checklist.**

| Section/topic                      | #  | Checklist item                                                                                                                                                                                                                                                                                              | Reported on page #    |
|------------------------------------|----|-------------------------------------------------------------------------------------------------------------------------------------------------------------------------------------------------------------------------------------------------------------------------------------------------------------|-----------------------|
| <b>TITLE</b>                       |    |                                                                                                                                                                                                                                                                                                             |                       |
| Title                              | 1  | Identify the report as a systematic review, meta-analysis, or both.                                                                                                                                                                                                                                         | <b># 1</b>            |
| <b>ABSTRACT</b>                    |    |                                                                                                                                                                                                                                                                                                             |                       |
| Structured summary                 | 2  | Provide a structured summary including, as applicable: background; objectives; data sources; study eligibility criteria, participants, and interventions; study appraisal and synthesis methods; results; limitations; conclusions and implications of key findings; systematic review registration number. | <b># 2</b>            |
| <b>INTRODUCTION</b>                |    |                                                                                                                                                                                                                                                                                                             |                       |
| Rationale                          | 3  | Describe the rationale for the review in the context of what is already known.                                                                                                                                                                                                                              | <b># 3</b>            |
| Objectives                         | 4  | Provide an explicit statement of questions being addressed with reference to participants, interventions, comparisons, outcomes, and study design (PICOS).                                                                                                                                                  | <b># 4</b>            |
| <b>METHODS</b>                     |    |                                                                                                                                                                                                                                                                                                             |                       |
| Protocol and registration          | 5  | Indicate if a review protocol exists, if and where it can be accessed (e.g., Web address), and, if available, provide registration information including registration number.                                                                                                                               | <b># 4</b>            |
| Eligibility criteria               | 6  | Specify study characteristics (e.g., PICOS, length of follow-up) and report characteristics (e.g., years considered, language, publication status) used as criteria for eligibility, giving rationale.                                                                                                      | <b># 4</b>            |
| Information sources                | 7  | Describe all information sources (e.g., databases with dates of coverage, contact with study authors to identify additional studies) in the search and date last searched.                                                                                                                                  | <b># 4</b>            |
| Search                             | 8  | Present full electronic search strategy for at least one database, including any limits used, such that it could be repeated.                                                                                                                                                                               | <b>Table S1</b>       |
| Study selection                    | 9  | State the process for selecting studies (i.e., screening, eligibility, included in systematic review, and, if applicable, included in the meta-analysis).                                                                                                                                                   | <b># 4, 5, Fig. 1</b> |
| Data collection process            | 10 | Describe method of data extraction from reports (e.g., piloted forms, independently, in duplicate) and any processes for obtaining and confirming data from investigators.                                                                                                                                  | <b># 5</b>            |
| Data items                         | 11 | List and define all variables for which data were sought (e.g., PICOS, funding sources) and any assumptions and simplifications made.                                                                                                                                                                       | <b># 5</b>            |
| Risk of bias in individual studies | 12 | Describe methods used for assessing risk of bias of individual studies (including specification of whether this was done at the study or outcome level), and how this information is to be used in any data synthesis.                                                                                      | <b># 5, 6</b>         |
| Summary measures                   | 13 | State the principal summary measures (e.g., risk ratio, difference in means).                                                                                                                                                                                                                               | <b># 5</b>            |

## Supporting Information

|                               |    |                                                                                                                                                                                                          |                 |
|-------------------------------|----|----------------------------------------------------------------------------------------------------------------------------------------------------------------------------------------------------------|-----------------|
| Synthesis of results          | 14 | Describe the methods of handling data and combining results of studies, if done, including measures of consistency (e.g., $I^2$ ) for each meta-analysis.                                                | # 5, 6          |
| Risk of bias across studies   | 15 | Specify any assessment of risk of bias that may affect the cumulative evidence (e.g., publication bias, selective reporting within studies).                                                             | # 5, 6          |
| Additional analyses           | 16 | Describe methods of additional analyses (e.g., sensitivity or subgroup analyses, meta-regression), if done, indicating which were pre-specified.                                                         | # 6             |
| <b>RESULTS</b>                |    |                                                                                                                                                                                                          |                 |
| Study selection               | 17 | Give numbers of studies screened, assessed for eligibility, and included in the review, with reasons for exclusions at each stage, ideally with a flow diagram.                                          | # 6             |
| Study characteristics         | 18 | For each study, present characteristics for which data were extracted (e.g., study size, PICOS, follow-up period) and provide the citations.                                                             | # 6, 7, Table 1 |
| Risk of bias within studies   | 19 | Present data on risk of bias of each study and, if available, any outcome level assessment (see item 12).                                                                                                | #7-9            |
| Results of individual studies | 20 | For all outcomes considered (benefits or harms), present, for each study: (a) simple summary data for each intervention group (b) effect estimates and confidence intervals, ideally with a forest plot. | #7-9            |
| Synthesis of results          | 21 | Present results of each meta-analysis done, including confidence intervals and measures of consistency.                                                                                                  | #7-9            |
| Risk of bias across studies   | 22 | Present results of any assessment of risk of bias across studies (see Item 15).                                                                                                                          | # 7-9           |
| Additional analysis           | 23 | Give results of additional analyses, if done (e.g., sensitivity or subgroup analyses, meta-regression [see Item 16]).                                                                                    | #10             |
| <b>DISCUSSION</b>             |    |                                                                                                                                                                                                          |                 |
| Summary of evidence           | 24 | Summarize the main findings including the strength of evidence for each main outcome; consider their relevance to key groups (e.g., healthcare providers, users, and policy makers).                     | # 10-14         |
| Limitations                   | 25 | Discuss limitations at study and outcome level (e.g., risk of bias), and at review-level (e.g., incomplete retrieval of identified research, reporting bias).                                            | #11-12          |
| Conclusions                   | 26 | Provide a general interpretation of the results in the context of other evidence, and implications for future research.                                                                                  | # 14            |
| <b>FUNDING</b>                |    |                                                                                                                                                                                                          |                 |
| Funding                       | 27 | Describe sources of funding for the systematic review and other support (e.g., supply of data); role of funders for the systematic review.                                                               | # 15            |

Reference: Moher D, Liberati A, Tetzlaff J, Altman DG, The PRISMA Group (2009). Preferred Reporting Items for Systematic Reviews and Meta-Analyses: The PRISMA Statement. PLoS Med 6(7): e1000097. doi:10.1371/journal.pmed1000097

## Supporting Information

**Supplementary Table S2. Electronic search terms and strategy.**

| <b>Search terms for PubMed (19 January 2021)</b>                                                                                                                                                                                                                                                                                                                                                                                                                                                                                                                                                                                                                                                                                                                                                                                                                                                                                                                                                                                                                                                                                                                                                                                                                                                                                                                                                                                                                                                                 |
|------------------------------------------------------------------------------------------------------------------------------------------------------------------------------------------------------------------------------------------------------------------------------------------------------------------------------------------------------------------------------------------------------------------------------------------------------------------------------------------------------------------------------------------------------------------------------------------------------------------------------------------------------------------------------------------------------------------------------------------------------------------------------------------------------------------------------------------------------------------------------------------------------------------------------------------------------------------------------------------------------------------------------------------------------------------------------------------------------------------------------------------------------------------------------------------------------------------------------------------------------------------------------------------------------------------------------------------------------------------------------------------------------------------------------------------------------------------------------------------------------------------|
| #1 "Vitamin D"[MeSH] OR "Cholecalciferol"[MeSH] OR "Ergocalciferols"[MeSH]                                                                                                                                                                                                                                                                                                                                                                                                                                                                                                                                                                                                                                                                                                                                                                                                                                                                                                                                                                                                                                                                                                                                                                                                                                                                                                                                                                                                                                       |
| #2 "Vitamin D"[Title/Abstract] OR "25-hydroxyvitamin D"[Title/Abstract] OR "25 oh d"[Title/Abstract] OR "1,25-dihydroxyvitamin D"[Title/Abstract] OR "cholecalciferol"[Title/Abstract] OR "ergocalciferol"[Title/Abstract]                                                                                                                                                                                                                                                                                                                                                                                                                                                                                                                                                                                                                                                                                                                                                                                                                                                                                                                                                                                                                                                                                                                                                                                                                                                                                       |
| #3 #1 OR #2                                                                                                                                                                                                                                                                                                                                                                                                                                                                                                                                                                                                                                                                                                                                                                                                                                                                                                                                                                                                                                                                                                                                                                                                                                                                                                                                                                                                                                                                                                      |
| #4 "diabetes, gestational"[MeSH] OR "Pre-Eclampsia"[MeSH] OR "hypertension, pregnancy induced"[MeSH] OR "Pregnancy Complications"[MeSH]                                                                                                                                                                                                                                                                                                                                                                                                                                                                                                                                                                                                                                                                                                                                                                                                                                                                                                                                                                                                                                                                                                                                                                                                                                                                                                                                                                          |
| #5 "diabetes gestational"[Title/Abstract] OR "diabetes pregnancy induced"[Title/Abstract] OR "diabetes pregnancy induced"[Title/Abstract] OR "pregnancy-induced diabetes"[Title/Abstract] OR "gestational diabetes"[Title/Abstract] OR "diabetes mellitus gestational"[Title/Abstract] OR "gestational diabetes mellitus"[Title/Abstract] OR "GDM"[Title/Abstract] OR "diabetes in pregnancy"[Title/Abstract] OR "Preeclampsia"[Title/Abstract] OR "pre-eclampsia"[Title/Abstract] OR "hypertension pregnancy induced"[Title/Abstract] OR "hypertension pregnancy induced"[Title/Abstract] OR "hypertensive disorder of pregnancy"[Title/Abstract] OR "pregnancy-induced hypertension"[Title/Abstract] OR "pregnancy-induced hypertension"[Title/Abstract] OR "pregnancy induced hypertensive disorder"[Title/Abstract] OR "pregnancy induced hypertensive disorders"[Title/Abstract] OR "PIH"[Title/Abstract] OR "HELLP"[Title/Abstract] OR "gestational hypertension"[Title/Abstract] OR "hypertension gestational"[Title/Abstract] OR "maternal hypertension"[Title/Abstract] OR "pregnancy complications"[Title/Abstract] OR "pregnancy complication"[Title/Abstract] OR "complications pregnancy"[Title/Abstract] OR "pregnancy outcomes"[Title/Abstract] OR "perinatal outcomes"[Title/Abstract] OR "maternal complications"[Title/Abstract] OR "caesarean section"[Title/Abstract] OR "caesarean delivery"[Title/Abstract] OR "caesarean section"[Title/Abstract] OR "cesarean delivery "[Title/Abstract] |
| #6 #4 OR #5                                                                                                                                                                                                                                                                                                                                                                                                                                                                                                                                                                                                                                                                                                                                                                                                                                                                                                                                                                                                                                                                                                                                                                                                                                                                                                                                                                                                                                                                                                      |
| #7 #3 AND #6                                                                                                                                                                                                                                                                                                                                                                                                                                                                                                                                                                                                                                                                                                                                                                                                                                                                                                                                                                                                                                                                                                                                                                                                                                                                                                                                                                                                                                                                                                     |
| <b>Search terms for Embase (19 January 2021)</b>                                                                                                                                                                                                                                                                                                                                                                                                                                                                                                                                                                                                                                                                                                                                                                                                                                                                                                                                                                                                                                                                                                                                                                                                                                                                                                                                                                                                                                                                 |
| #1 'ergocalciferol'/exp OR 'coleciferol'/exp OR 'vitamin d'/exp                                                                                                                                                                                                                                                                                                                                                                                                                                                                                                                                                                                                                                                                                                                                                                                                                                                                                                                                                                                                                                                                                                                                                                                                                                                                                                                                                                                                                                                  |
| #2 'vitamin d':ab,ti OR '25-hydroxyvitamin d':ab,ti OR (25(OH)D:ab,ti) OR 1,25-dihydroxyvitamin d':ab,ti OR cholecalciferol:ab,ti OR ergocalciferol:ab,ti                                                                                                                                                                                                                                                                                                                                                                                                                                                                                                                                                                                                                                                                                                                                                                                                                                                                                                                                                                                                                                                                                                                                                                                                                                                                                                                                                        |

## Supporting Information

|                                                                                                                                                                                                                                                                                                                                                                                                                                                                                                                                                                                                                                                                                                                                                                                                                                                                                                                                                                                                                                                                                                                                                                           |
|---------------------------------------------------------------------------------------------------------------------------------------------------------------------------------------------------------------------------------------------------------------------------------------------------------------------------------------------------------------------------------------------------------------------------------------------------------------------------------------------------------------------------------------------------------------------------------------------------------------------------------------------------------------------------------------------------------------------------------------------------------------------------------------------------------------------------------------------------------------------------------------------------------------------------------------------------------------------------------------------------------------------------------------------------------------------------------------------------------------------------------------------------------------------------|
| #3 #1 OR #2                                                                                                                                                                                                                                                                                                                                                                                                                                                                                                                                                                                                                                                                                                                                                                                                                                                                                                                                                                                                                                                                                                                                                               |
| #4 'pregnancy diabetes mellitus'/exp OR 'preeclampsia'/exp OR 'maternal hypertension'/exp OR 'pregnancy complication'/exp                                                                                                                                                                                                                                                                                                                                                                                                                                                                                                                                                                                                                                                                                                                                                                                                                                                                                                                                                                                                                                                 |
| #5 'diabetes, gestational':ab,ti OR 'diabetes, pregnancy induced':ab,ti OR 'diabetes, pregnancy-induced':ab,ti OR 'pregnancy-induced diabetes':ab,ti OR gestational diabetes':ab,ti OR 'diabetes mellitus, gestational':ab,ti OR 'gestational diabetes mellitus':ab,ti OR gdm:ab,ti OR 'diabetes in pregnancy':ab,ti OR preeclampsia:ab,ti OR 'pre eclampsia':ab,ti OR 'hypertension, pregnancy-induced':ab,ti OR 'hypertension, pregnancy induced':ab,ti OR 'hypertensive disorder of pregnancy':ab,ti OR 'hypertensive disorders of pregnancy':ab,ti OR 'pregnancy induced hypertension':ab,ti OR 'pregnancy induced hypertensive disorder':ab,ti OR 'pregnancy induced hypertensive disorders':ab,ti OR pih:ab,ti OR hellp:ab,ti OR 'gestational hypertension':ab,ti OR 'hypertension, gestational':ab,ti OR 'maternal hypertension':ab,ti OR 'pregnancy complications':ab,ti OR 'pregnancy complication':ab,ti OR 'complications, pregnancy':ab,ti OR 'pregnancy outcomes':ab,ti OR 'perinatal outcomes':ab,ti OR 'maternal complications':ab,ti OR 'cesarean delivery':ab,ti OR 'caesarean section':ab,ti OR 'caesarean delivery':ab,ti OR 'caesarean section':ab,ti |
| #6 #4 OR #5                                                                                                                                                                                                                                                                                                                                                                                                                                                                                                                                                                                                                                                                                                                                                                                                                                                                                                                                                                                                                                                                                                                                                               |
| #7 #3 AND #6                                                                                                                                                                                                                                                                                                                                                                                                                                                                                                                                                                                                                                                                                                                                                                                                                                                                                                                                                                                                                                                                                                                                                              |
| <b>Search terms for Scopus (19 January 2021)</b>                                                                                                                                                                                                                                                                                                                                                                                                                                                                                                                                                                                                                                                                                                                                                                                                                                                                                                                                                                                                                                                                                                                          |
| #1 ((TITLE-ABS-KEY ("vitamin D") OR TITLE-ABS-KEY ("25-hydroxyvitamin D") OR TITLE-ABS-KEY ("25(OH)D") OR TITLE-ABS-KEY ("1,25-dihydroxyvitamin D") OR TITLE-ABS-KEY ("cholecalciferol") OR TITLE-ABS-KEY ("ergocalciferol")))                                                                                                                                                                                                                                                                                                                                                                                                                                                                                                                                                                                                                                                                                                                                                                                                                                                                                                                                            |
| #2 ((TITLE-ABS-KEY ("pregnancy induced diabetes") OR TITLE-ABS-KEY ("gestational diabetes") OR TITLE-ABS-KEY ("gestational diabetes mellitus") OR TITLE-ABS-KEY ("GDM") OR TITLE-ABS-KEY ("diabetes in pregnancy") OR TITLE-ABS-KEY ("Preeclampsia") OR TITLE-ABS-KEY ("pre-eclampsia") OR TITLE-ABS-KEY ("hypertensive disorder of pregnancy") OR TITLE-ABS-KEY ("hypertensive disorders of pregnancy") OR TITLE-ABS-KEY ("pregnancy induced hypertension") OR TITLE-ABS-KEY ("pregnancy-induced hypertension") OR TITLE-ABS-KEY ("pregnancy induced hypertensive disorder") OR TITLE-ABS-KEY ("pregnancy induced hypertensive disorders") OR TITLE-ABS-KEY ("PIH") OR TITLE-ABS-KEY ("HELLP") OR TITLE-ABS-KEY ("gestational hypertension") OR TITLE-ABS-KEY ("maternal hypertension") OR TITLE-ABS-KEY ("Pregnancy Complications") OR TITLE-ABS-KEY ("pregnancy complication") OR TITLE-ABS-KEY ("pregnancy outcomes") OR TITLE-ABS-KEY                                                                                                                                                                                                                                |

## Supporting Information

|                                                                                                                                                                                                                                                                                                                                                                                                                                                                                                                                                                                                                                                                                                                                                                                                                                                                                                                                                                                                                                                                                                                             |
|-----------------------------------------------------------------------------------------------------------------------------------------------------------------------------------------------------------------------------------------------------------------------------------------------------------------------------------------------------------------------------------------------------------------------------------------------------------------------------------------------------------------------------------------------------------------------------------------------------------------------------------------------------------------------------------------------------------------------------------------------------------------------------------------------------------------------------------------------------------------------------------------------------------------------------------------------------------------------------------------------------------------------------------------------------------------------------------------------------------------------------|
| ("perinatal outcomes") OR TITLE-ABS-KEY ("maternal complications")) OR ((TITLE-ABS-KEY (pregnan*) OR TITLE-ABS-KEY (gestation*) OR TITLE-ABS-KEY ("maternal") OR TITLE-ABS-KEY ("prenatal"))) OR ((TITLE-ABS-KEY ("caesarean section") OR TITLE-ABS-KEY ("caesarean delivery") OR TITLE-ABS-KEY ("caesarean section") OR TITLE-ABS-KEY ("cesarean delivery")))                                                                                                                                                                                                                                                                                                                                                                                                                                                                                                                                                                                                                                                                                                                                                              |
| #3 #1 AND #2                                                                                                                                                                                                                                                                                                                                                                                                                                                                                                                                                                                                                                                                                                                                                                                                                                                                                                                                                                                                                                                                                                                |
| <b>Search terms for the Web of Science (19 January 2021)</b>                                                                                                                                                                                                                                                                                                                                                                                                                                                                                                                                                                                                                                                                                                                                                                                                                                                                                                                                                                                                                                                                |
| #1 TS="vitamin D" OR TS="25-hydroxyvitamin D" OR TS="25(OH)D" OR TS="1,25-dihydroxyvitamin D" OR TS="cholecalciferol" OR TS="ergocalciferol"                                                                                                                                                                                                                                                                                                                                                                                                                                                                                                                                                                                                                                                                                                                                                                                                                                                                                                                                                                                |
| #2 TS="diabetes pregnancy induced" OR TS="diabetes, pregnancy induced" OR TS="diabetes, pregnancy-induced" OR TS="pregnancy-induced diabetes" OR TS="gestational diabetes" OR TS="diabetes mellitus, gestational" OR TS="gestational diabetes mellitus" OR TS="GDM" OR TS="diabetes in pregnancy" OR TS="Preeclampsia" OR TS="Pre-Eclampsia" OR TS="hypertension, pregnancy-induced" OR TS="hypertension, pregnancy induced" OR TS="hypertensive disorder of pregnancy" OR TS="hypertensive disorders of pregnancy" OR TS="pregnancy induced hypertension" OR TS="pregnancy-induced hypertension" OR TS="pregnancy induced hypertensive disorder" OR TS="pregnancy induced hypertensive disorders" OR TS="HELLP" OR TS="PIH" OR TS="gestational hypertension" OR TS="hypertension, gestational" OR TS="maternal hypertension" OR TS="Pregnancy Complications" OR TS="pregnancy complication" OR TS="complications, pregnancy" OR TS="pregnancy outcomes" OR TS="perinatal outcomes" OR TS="maternal complications" OR TS="caesarean section" OR TS="caesarean delivery" OR TS="caesarean section" OR TS="cesarean delivery" |
| #3 #1 AND #2                                                                                                                                                                                                                                                                                                                                                                                                                                                                                                                                                                                                                                                                                                                                                                                                                                                                                                                                                                                                                                                                                                                |

## Supporting Information

**Supplementary Table S3. List of excluded studies along with reason.**

| Author                         | Study                                                                                                                                               | Reason for exclusion |
|--------------------------------|-----------------------------------------------------------------------------------------------------------------------------------------------------|----------------------|
| Giapros, 2013 <sup>1</sup>     | Vitamin D levels and insulin resistance in children born with severe growth restriction                                                             | No relevant outcome  |
| Aljanahi, 2020 <sup>2</sup>    | The Effect of Dietary Intake of Vitamin D on Gestational Diabetes Mellitus                                                                          | No original data     |
| Lo, 2019 <sup>3</sup>          | Effect of Vitamin D supplementation during pregnancy on maternal and perinatal outcomes                                                             | Reviews              |
| Loudyi, 2016 <sup>4</sup>      | Vitamin D status in Moroccan pregnant women and newborns: reports of 102 cases                                                                      | No original data     |
| Møller, 2012 <sup>5</sup>      | Effects of 25OHD concentrations on chances of pregnancy and pregnancy outcomes: A cohort study in healthy Danish women                              | No relevant outcome  |
| Fatima, 2018 <sup>6</sup>      | Low vitamin D and risk for small for gestation age babies in gestational diabetes                                                                   | No original data     |
| Budhwar, 2020 <sup>7</sup>     | Altered cord serum 25-hydroxyvitamin D signaling and placental inflammation is associated with pre-term birth                                       | No original data     |
| Karras, 2016 <sup>8</sup>      | Maternal vitamin D levels during pregnancy and neonatal health: evidence to date and clinical implications                                          | Reviews              |
| Mumford, 2018 <sup>9</sup>     | Association of preconception serum 25-hydroxyvitamin D concentrations with livebirth and pregnancy loss: a prospective cohort study                 | No original data     |
| Yusrawati, 2017 <sup>10</sup>  | Third trimester maternal 1,25-dihydroxyvitamin D and neonatal birth weight                                                                          | No original data     |
| Watson, 2010 <sup>11</sup>     | The association of maternal diet and dietary supplement intake in pregnant New Zealand women with infant birthweight                                | No original data     |
| Rezavand, 2019 <sup>12</sup>   | The effect of VDR gene polymorphisms and vitamin D level on blood pressure, risk of preeclampsia, gestational age, and body mass index              | No original data     |
| Dong, 2019 <sup>13</sup>       | The relationship between vitamin D and insulin resistance before delivery in advanced maternal age                                                  | No relevant outcome  |
| Wierzejska, 2018 <sup>14</sup> | Maternal and Cord Blood Vitamin D Status and Anthropometric Measurements in Term Newborns at Birth                                                  | No relevant outcome  |
| Paxton, 2013 <sup>15</sup>     | Vitamin D and health in pregnancy, infants, children and adolescents in Australia and New Zealand: a position statement                             | Reviews              |
| Dovnik, 2017 <sup>16</sup>     | Determinants of maternal vitamin D concentrations in Slovenia: A prospective observational study                                                    | No original data     |
| Grant, 2011 <sup>17</sup>      | Adequate vitamin D during pregnancy reduces the risk of premature birth by reducing placental colonization by bacterial vaginosis species           | Letter               |
| Tamblyn, 2018 <sup>18</sup>    | Serum and urine vitamin D metabolite analysis in early preeclampsia                                                                                 | No original data     |
| Hollis, 2013 <sup>19</sup>     | Vitamin D and pregnancy: Skeletal effects, nonskeletal effects, and birth outcomes                                                                  | Reviews              |
| Casey, 2018 <sup>20</sup>      | Maternal vitamin D and neonatal anthropometrics and markers of neonatal glycaemia: Belfast Hyperglycemia and Adverse Pregnancy Outcome (HAPO) study | No original data     |
| Dovnik, 2018 <sup>21</sup>     | The association of vitamin D levels with common pregnancy complications                                                                             | Reviews              |
| Song, 2018 <sup>22</sup>       | High prevalence of vitamin D deficiency in pregnant women and its relationship with adverse pregnancy outcomes in Guizhou, China                    | No relevant outcome  |
| Li, 2017 <sup>23</sup>         | Women with recurrent spontaneous abortion have decreased 25(OH) vitamin D and VDR at the fetal-maternal interface                                   | No original data     |
| Liu, 2017 <sup>24</sup>        | Investigation of the vitamin D nutritional status in women with gestational diabetes mellitus in Beijing                                            | No original data     |



## Supporting Information

|                                    |                                                                                                                                                                          |                             |
|------------------------------------|--------------------------------------------------------------------------------------------------------------------------------------------------------------------------|-----------------------------|
| Bao, 2018 <sup>25</sup>            | Prepregnancy habitual intake of vitamin D from diet and supplements in relation to risk of gestational diabetes mellitus: A prospective cohort study                     | No relevant exposure        |
| Bodnar, 2010 <sup>26</sup>         | Vitamin D may be a link to black-white disparities in adverse birth outcomes                                                                                             | Reviews                     |
| Mannion, 2006 <sup>27</sup>        | Association of low intake of milk and vitamin D during pregnancy with decreased birth weight                                                                             | No relevant outcome         |
| Hyde, 2017 <sup>28</sup>           | Maternal Dietary Nutrient Intake During Pregnancy and Offspring Linear Growth and Bone: The Vitamin D in Pregnancy Cohort Study                                          | No relevant outcome         |
| Brooke, 1981 <sup>29</sup>         | Intrauterine vitamin D nutrition and postnatal growth in Asian infants                                                                                                   | Published only as abstracts |
| Bhowmik, 2019 <sup>30</sup>        | Maternal BMI and nutritional status in early pregnancy and its impact on neonatal outcomes at birth in Bangladesh                                                        | No relevant outcome         |
| Kabaran, 2013 <sup>31</sup>        | Effects of vitamins B12, folic acid, A, D, E and C on maternal and fetal health                                                                                          | No original data            |
| Bond, 2008 <sup>32</sup>           | Low Levels of Vitamin D in Women Increase the Risk of Preeclampsia                                                                                                       | Published only as abstracts |
| Saha, 2020 <sup>33</sup>           | The risk of morbidities in newborns of antenatal vitamin D supplemented gestational diabetes mellitus patients                                                           | Reviews                     |
| Aji, 2020 <sup>34</sup>            | A genetic approach to study the relationship between maternal Vitamin D status and newborn anthropometry measurements: the Vitamin D pregnant mother (VDPM) cohort study | No original data            |
| Vestergaard, 2021 <sup>35</sup>    | Vitamin D insufficiency among Danish pregnant women—Prevalence and association with adverse obstetric outcomes and placental vitamin D metabolism                        | No original data            |
| Ullah, 2012 <sup>36</sup>          | Association of preeclampsia and eclampsia with vitamin d deficiency: Study findings from patients in a tertiary care hospital in Bangladesh                              | Published only as abstracts |
| Olmos-Ortiz, 2015 <sup>37</sup>    | Regulation of calcitriol biosynthesis and activity: Focus on gestational vitamin D deficiency and adverse pregnancy outcomes                                             | Reviews                     |
| Yoon, 2017 <sup>38</sup>           | Gestational diabetes mellitus, fetal growth and vitamin D                                                                                                                | Reviews                     |
| Thomas, 2011 <sup>39</sup>         | The correlation between third-trimester maternal and newborn-serum 25-hydroxy-vitamin D in a selected South Australian group of newborn samples                          | No original data            |
| Velkavrh, 2019 <sup>40</sup>       | The Influence of Maternal Levels of Vitamin D and Adiponectin on Anthropometrical Measures and Bone Health in Offspring                                                  | No relevant outcome         |
| McGrath, 2005 <sup>41</sup>        | Seasonal fluctuations in birth weight and neonatal limb length; does prenatal vitamin D influence neonatal size and shape?                                               | No original data            |
| Dabbaghmanesh, 2015 <sup>42</sup>  | Comparison of 25-hydroxyvitamin D and calcium levels between preeclampsia and normal pregnant women and birth outcomes                                                   | No original data            |
| Sonuga, 2020 <sup>43</sup>         | Hypovitaminosis D Is Associated with Some Metabolic Indices in Gestational Diabetes Mellitus                                                                             | No relevant outcome         |
| Krenz-Niedbała, 2011 <sup>44</sup> | Season of birth and subsequent body size: the potential role of prenatal vitamin D                                                                                       | No relevant outcome         |
| Sletner, 2010 <sup>45</sup>        | Levels of 25-OH-vitamin D in early pregnancy in women from five ethnic groups with and without gestational diabetes                                                      | Published only as abstracts |
| Rutz, 2005 <sup>46</sup>           | Hypovitaminosis D, insulin resistance and hypertension in pregnancy                                                                                                      | Letter                      |
| Amirlak, 2009 <sup>47</sup>        | Current maternal-infant micronutrient status and the effects on birth weight in the United Arab Emirates                                                                 | No relevant outcome         |
| Agudelo-Zapata, 2018 <sup>48</sup> | Serum 25-hydroxyvitamin D levels throughout pregnancy: A longitudinal study in healthy and preeclamptic pregnant women                                                   | No original data            |
| Quack Lötscher, 2015 <sup>49</sup> | Impact of vitamin D during pregnancy on maternal health                                                                                                                  | Published only as abstracts |

## Supporting Information

|                                  |                                                                                                                                                                                   |                      |
|----------------------------------|-----------------------------------------------------------------------------------------------------------------------------------------------------------------------------------|----------------------|
| Triunfo, 2017 <sup>50</sup>      | Low maternal circulating levels of vitamin D as potential determinant in the development of gestational diabetes mellitus                                                         | Reviews              |
| Vellinga, 2012 <sup>51</sup>     | Associations of Body Mass Index (Maternal BMI) and Gestational Diabetes Mellitus with Neonatal and Maternal Pregnancy Outcomes in a Multicentre European Database                 | No original data     |
| Triunfo, 2016 <sup>52</sup>      | Potential impact of maternal Vitamin D status on obstetric well-being                                                                                                             | Reviews              |
| Liu, 2021 <sup>53</sup>          | Associations of Serum Selenium Levels in the First Trimester of Pregnancy with the Risk of Gestational Diabetes Mellitus and Preterm Birth: a Preliminary Cohort Study            | No original data     |
| Principi, 2013 <sup>54</sup>     | Implications of maternal vitamin D deficiency for the fetus, the neonate and the young infant                                                                                     | Reviews              |
| Thomsen, 2020 <sup>55</sup>      | Vitamin D and the risk of dystocia: A case-control study                                                                                                                          | No relevant outcome  |
| Liu, 2020 <sup>56</sup>          | Combined Effect of Maternal Vitamin D Deficiency and Gestational Diabetes Mellitus on Trajectories of Ultrasound-Measured Fetal Growth: A Birth Cohort Study in Beijing, China    | No relevant outcome  |
| Hou, 2016 <sup>57</sup>          | Decreased serum Vitamin D levels in early spontaneous pregnancy loss                                                                                                              | No relevant outcome  |
| Tapan, 2016 <sup>58</sup>        | Assessing Vitamin D status in infants with very low birth weight                                                                                                                  | Letter               |
| Aydeniz, 2019 <sup>59</sup>      | The Relationship between First Trimester 25-Hydroxyvitamin D3 Levels and Second Trimester Femur Length and Their Effects on Birth Weight and Length at Birth: A Preliminary Study | No relevant outcome  |
| Swamy, 2011 <sup>60</sup>        | Maternal vitamin D receptor genetic variation contributes to infant birthweight among black mothers                                                                               | No relevant outcome  |
| Wibowo, 2020 <sup>61</sup>       | Vitamin D3 levels in the maternal serum, cord blood, and placenta of preeclamptic pregnant women                                                                                  | No relevant outcome  |
| Horan, 2015 <sup>62</sup>        | The association between maternal dietary micronutrient intake and neonatal anthropometry - Secondary analysis from the ROLO study                                                 | No original data     |
| Kaludjerovic, 2010 <sup>63</sup> | Relationship between vitamin D during perinatal development and health                                                                                                            | Reviews              |
| Francis, 2018 <sup>64</sup>      | Longitudinal Maternal Vitamin D Status during Pregnancy Is Associated with Neonatal Anthropometric Measures                                                                       | No relevant outcome  |
| Boskabadi, 2018 <sup>65</sup>    | Serum level of vitamin D in preterm infants and its association with premature-related respiratory complications: a case-control study                                            | No relevant outcome  |
| Kazemi, 2009 <sup>66</sup>       | High prevalence of vitamin D deficiency among pregnant women and their newborns in an Iranian population                                                                          | No original data     |
| Larqué, 2018 <sup>67</sup>       | Maternal and Foetal Health Implications of Vitamin D Status during Pregnancy                                                                                                      | Reviews              |
| Hitman, 2012 <sup>68</sup>       | Vitamin D, diabetic neuropathy and supplementation post-gestational diabetes                                                                                                      | No original data     |
| Roth, 2019 <sup>69</sup>         | Vitamin D Supplementation in Pregnancy and Lactation and Infant Growth                                                                                                            | Intervention studies |
| Hyppönen, 2011 <sup>70</sup>     | Preventing vitamin D deficiency in pregnancy - Importance for the mother and child                                                                                                | Reviews              |
| Esmeraldo, 2019 <sup>71</sup>    | Vitamin D in Term Newborns: Relation with Maternal Concentrations and Birth Weight                                                                                                | No original data     |
| Boghossian, 2019 <sup>72</sup>   | Longitudinal measures of maternal vitamin D and neonatal body composition                                                                                                         | No relevant outcome  |
| Burris, 2014 <sup>73</sup>       | Vitamin D and gestational diabetes mellitus                                                                                                                                       | Reviews              |
| Orvik, 2020 <sup>74</sup>        | Variation in plasma 25-hydroxyvitamin D2 and D3 in normal pregnancy with gestational age, sampling season, and complications: A longitudinal cohort study                         | No original data     |
| Prentice, 2009 <sup>75</sup>     | Maternal plasma 25-hydroxyvitamin D concentration and                                                                                                                             | No original data     |

## Supporting Information

|                                    |                                                                                                                                                                                                                               |                             |
|------------------------------------|-------------------------------------------------------------------------------------------------------------------------------------------------------------------------------------------------------------------------------|-----------------------------|
|                                    | birthweight, growth and bone mineral accretion of Gambian infants                                                                                                                                                             |                             |
| Judistiani, 2019 <sup>76</sup>     | Association of first trimester maternal vitamin D, ferritin and hemoglobin level with third trimester fetal biometry: result from cohort study on vitamin D status and its impact during pregnancy and childhood in Indonesia | No relevant outcome         |
| Kaptanis, 2012 <sup>77</sup>       | Vitamin D supplementation for the prevention of pre-eclampsia? 'First do no harm'                                                                                                                                             | Letter                      |
| Domaracki, 2016 <sup>78</sup>      | Serum 25(OH) vitamin D levels in polishwomen during pregnancies complicated by hypertensive disorders and gestational diabetes                                                                                                | No relevant outcome         |
| Shor, 2015 <sup>79</sup>           | The effects of maternal vitamin D on neonatal growth parameters                                                                                                                                                               | No relevant outcome         |
| Tao, 2018 <sup>80</sup>            | Current Recommended Vitamin D Prenatal Supplementation and Fetal Growth: Results From the China-Anhui Birth Cohort Study                                                                                                      |                             |
| Tian, 2016 <sup>81</sup>           | Maternal Serum 25-Hydroxyvitamin D Concentrations during Pregnancy and Infant Birthweight for Gestational Age: A Three-Cohort Study                                                                                           | No relevant outcome         |
| Rutkowska, 2016 <sup>82</sup>      | Vitamin D deficiency in women with gestational diabetes mellitus                                                                                                                                                              | No original data            |
| Rudnicki, 1997 <sup>83</sup>       | Effect of 1,25-dihydroxycholecalciferol on glucose metabolism in gestational diabetes mellitus                                                                                                                                | No original data            |
| Hemalatha, 2018 <sup>84</sup>      | Maternal Vitamin D Status and Neonatal Outcomes                                                                                                                                                                               | Letter                      |
| Genuis, 2015 <sup>85</sup>         | Maternal and Pediatric Health Outcomes in relation to Gestational Vitamin D Sufficiency                                                                                                                                       | Reviews                     |
| Jensen, 2014 <sup>86</sup>         | Does prenatal exposure to vitamin D-fortified margarine and milk alter birth weight? A societal experiment                                                                                                                    | No original data            |
| Pereira-Santos, 2019 <sup>87</sup> | Polymorphism in the vitamin D receptor gene is associated with maternal vitamin D concentration and neonatal outcomes: A Brazilian cohort study                                                                               | No relevant outcome         |
| Bennett, 2013 <sup>88</sup>        | Maternal Vitamin D Status in Type 1 Diabetic Pregnancy: Impact on Neonatal Vitamin D Status and Association with Maternal Glycaemic Control                                                                                   | No relevant outcome         |
| Hewison, 2010 <sup>89</sup>        | Vitamin D insufficiency and skeletal development in utero                                                                                                                                                                     | Comment                     |
| Yakoob, 2011 <sup>90</sup>         | Vitamin d deficiency during pregnancy and the risk of preeclampsia                                                                                                                                                            | Letter                      |
| Martineau, 2014 <sup>91</sup>      | Maternal vitamin D insufficiency is associated with adverse pregnancy and neonatal outcomes                                                                                                                                   | Reviews                     |
| Zera, 2011 <sup>92</sup>           | First and third trimester plasma vitamin D, angiogenic factors, and preeclampsia                                                                                                                                              | Published only as abstracts |
| Burris, 2011 <sup>93</sup>         | Vitamin D deficiency in pregnancy is associated with gestational diabetes                                                                                                                                                     | Published only as abstracts |
| Zazerskaya, 2016 <sup>94</sup>     | Deficiency of vitamin D and gestational complications according to research data in Saint Petersburg, Russian Federation                                                                                                      | Published only as abstracts |
| Yılmaz, 2018 <sup>95</sup>         | Vitamin D levels in newborns and association with neonatal hypocalcemia                                                                                                                                                       | No relevant outcome         |
| Yang, 2017 <sup>96</sup>           | Influence of Vitamin D level in the second trimester of pregnancy on the complications of Chinese pregnant women and fetuses                                                                                                  | No relevant outcome         |
| Würtz, 2012 <sup>97</sup>          | Vitamin D in pregnant german women and their newborns                                                                                                                                                                         | Published only as abstracts |
| Wetta, 2012 <sup>98</sup>          | Midtrimester vitamin D status is not associated with preeclampsia prior to 37 weeks                                                                                                                                           | Published only as abstracts |
| Wetta, 2012 <sup>99</sup>          | Midtrimester Vitamin D status is not associated with spontaneous preterm birth prior to 35 weeks                                                                                                                              | Published only as abstracts |
| Weiss, 2012 <sup>100</sup>         | Does vitamin D given during pregnancy reduce preterm birth and pre-eclampsia?                                                                                                                                                 | Published only as abstracts |
| Wei, 2013 <sup>101</sup>           | Associations of plasma 25-hydroxyvitamin D levels with                                                                                                                                                                        | Published only as           |

## Supporting Information

---

|                                   |                                                                                                                                                      |                                          |
|-----------------------------------|------------------------------------------------------------------------------------------------------------------------------------------------------|------------------------------------------|
| Wei, 2016 <sup>102</sup>          | endothelial function and preeclampsia<br>Prenatal vitamin d status and neonatal outcomes                                                             | abstracts<br>Published only as abstracts |
| Wei, 2013 <sup>103</sup>          | Maternal obese, vitamin d status and risk of preeclampsia                                                                                            | Published only as abstracts              |
| Wei, 2012 <sup>104</sup>          | Vitamin D receptor gene polymorphisms and risk of preeclampsia                                                                                       | Published only as abstracts              |
| Wei, 2014 <sup>105</sup>          | Association of maternal vitamin D status and oxidative stress during pregnancy and risk of preeclampsia                                              | Published only as abstracts              |
| Wang, 2020 <sup>106</sup>         | Placenta expression of vitamin D and related genes in pregnant women with gestational diabetes mellitus                                              | No original data                         |
| Walsh, 2019 <sup>107</sup>        | Avoiding maternal vitamin D deficiency may lower blood glucose in pregnancy                                                                          | No relevant outcome                      |
| Walsh, 2012 <sup>108</sup>        | Impact of maternal and fetal adiposity on maternal and fetal vitamin D                                                                               | Published only as abstracts              |
| von Websky, 2018 <sup>109</sup>   | Impact of vitamin D on pregnancy-related disorders and on offspring outcome                                                                          | Reviews                                  |
| Vivanti, 2020 <sup>110</sup>      | Vitamin D and pregnancy outcomes: Overall results of the FEPED study                                                                                 | No original data                         |
| Vij, 2017 <sup>111</sup>          | Study to find out the prevalence of Vitamin D deficiency in cord blood                                                                               | Published only as abstracts              |
| Valkama, 2018 <sup>112</sup>      | Body size modifies the relationship between maternal serum 25-hydroxyvitamin D concentrations and gestational diabetes in high-risk women            | No original data                         |
| Thorp, 2011 <sup>113</sup>        | Vitamin D, fish consumption and preterm birth: Is there a link                                                                                       | Published only as abstracts              |
| Stuebe, 2011 <sup>114</sup>       | Vitamin D-associated polymorphisms and hypertensive complications of pregnancy                                                                       | Published only as abstracts              |
| Stougaard, 2016 <sup>115</sup>    | Interauterin exposure to extra vitamin D from fortified margarine and later risk of preeclampsia                                                     | Published only as abstracts              |
| Specker, 2012 <sup>116</sup>      | Does vitamin D during pregnancy impact offspring growth and bone?                                                                                    | Reviews                                  |
| Skouroliakou, 2016 <sup>117</sup> | Investigation of multiple factors which may contribute to Vitamin D levels of bedridden pregnant women and their preterm neonates                    | No relevant outcome                      |
| Singh, 2018 <sup>118</sup>        | Vitamin d status in preeclamptic and non preeclamptic pregnant women: Indian data                                                                    | Published only as abstracts              |
| Singh, 2011 <sup>119</sup>        | The relationship between cord blood vitamin D and neonatal body composition                                                                          | No relevant outcome                      |
| Shibata, 2010 <sup>120</sup>      | High prevalence of hypovitaminosis D in Japanese pregnant women with threatened premature delivery                                                   | Published only as abstracts              |
| Naghshineh, 2016 <sup>121</sup>   | Effect of vitamin D supplementation in the reduce risk of preeclampsia in nulliparous women                                                          | Intervention studies                     |
| Mokarram, 2021 <sup>122</sup>     | Study of vitamin D receptor gene methylation and the risk of gestational diabetes mellitus in Iranian pregnant women                                 | No relevant outcome                      |
| McDonnell, 2018 <sup>123</sup>    | Prenatal correction of vitamin D deficiency is associated with substantial reduction in preterm birth                                                | Published only as abstracts              |
| Marwaha, 2011 <sup>124</sup>      | Vitamin D status in pregnant Indian women across trimesters and different seasons and its correlation with neonatal serum 25-hydroxyvitamin D levels | No original data                         |
| Martin, 2020 <sup>125</sup>       | Vitamin-D dysregulation in early- and late-onset preeclampsia: A gestational-age matched study                                                       | No original data                         |
| Magnus, 2016 <sup>126</sup>       | Association of vitamin D concentrations with gestational hypertension and pre-eclampsia: A Mendelian randomisation analysis                          | Published only as abstracts              |
| Lykkedegn, 2017 <sup>127</sup>    | Vitamin D supplementation, cord 25-hydroxyvitamin D and birth weight: Findings from the Odense Child Cohort                                          | No relevant outcome                      |

## Supporting Information

---

|                                    |                                                                                                                                                                                       |                             |
|------------------------------------|---------------------------------------------------------------------------------------------------------------------------------------------------------------------------------------|-----------------------------|
| Liu, 2016 <sup>128</sup>           | Serum vitamin D levels in gestational diabetes mellitus patients and its relationship with islet cell function                                                                        | Published only as abstracts |
| Lawlor, 2013 <sup>129</sup>        | Association of maternal vitamin D status during pregnancy with bone-mineral content in offspring: a prospective cohort study                                                          | No relevant outcome         |
| Larqué, 2017 <sup>130</sup>        | Vitamin D levels during pregnancy and fetal implications                                                                                                                              | Published only as abstracts |
| Lanham, 2013 <sup>131</sup>        | Effect of vitamin D deficiency during pregnancy on offspring bone structure, composition and quality in later life                                                                    | No relevant outcome         |
| Lacroix, 2012 <sup>132</sup>       | Lower levels of vitamin D at first trimester of pregnancy are associated with higher risk of developing gestational diabetes mellitus                                                 | Published only as abstracts |
| Krishnamurthy, 2012 <sup>133</sup> | Vitamin d deficiency and insufficiency; is it a risk factor for gestational diabetes and poorer glycemic control in pre existing diabetes in pregnancy? A hospital based cohort study | Published only as abstracts |
| Kochar, 2019 <sup>134</sup>        | Prevalence of Vitamin D Deficiency in Cord Blood                                                                                                                                      | No relevant outcome         |
| Kim, 2014 <sup>135</sup>           | Vitamin D deficiency is associated with higher risk of postpartum glucose intolerance in women with gestational diabetes mellitus                                                     | Published only as abstracts |
| Kim, 2018 <sup>136</sup>           | A comparative analysis of maternal and fetal 25-hydroxyvitamin D in pregnant women with and without gestational diabetes mellitus                                                     | No original data            |
| Kim, 2015 <sup>137</sup>           | The relationship between maternal and fetal 25-hydroxy vitamin D in pregnant women with gestational diabetes mellitus                                                                 | Published only as abstracts |
| Kılıcaslan, 2018 <sup>138</sup>    | The effects of vitamin D supplementation during pregnancy and maternal vitamin D levels on neonatal vitamin D levels and birth parameters                                             | No relevant outcome         |
| Kiely, 2017 <sup>139</sup>         | Vitamin D metabolite concentrations in umbilical cord blood serum and associations with clinical characteristics in a large prospective mother-infant cohort in Ireland               | No original data            |
| Khashan, 2013 <sup>140</sup>       | The impact of vitamin d status in early pregnancy on later uteroplacental dysfunction                                                                                                 | Published only as abstracts |
| Khandavalli, 2015 <sup>141</sup>   | Hypovitaminosis D in 1st trimester may predict gestational diabetes                                                                                                                   | Published only as abstracts |
| Khandavalli, 2015 <sup>142</sup>   | Hypovitaminosis D in early pregnancy as a predictor of gestational diabetes mellitus                                                                                                  | Published only as abstracts |
| Kepkep, 2020 <sup>143</sup>        | Determination of serum vitamin D status of mothers and newborns and related outcomes                                                                                                  | Published only as abstracts |
| Kenny, 2013 <sup>144</sup>         | Vitamin D deficiency increases the risk of spontaneous preterm birth                                                                                                                  | Published only as abstracts |
| Karras, 2013 <sup>145</sup>        | An observational study reveals that neonatal vitamin D is primarily determined by maternal contributions: Implications of a new assay on the roles of vitamin D forms                 | No original data            |

---

## Reference

1. V. I. Giapros, A. S. Challa, V. L. Cholevas, E. N. Evagelidou, E. T. Bairaktari and S. K. Andronikou, Vitamin D levels and insulin resistance in children born with severe growth restriction, *Horm. Metab. Res.*, 2013, **45**, 226-230.
2. A. Aljanahi, H. Hadhiah, W. Al-Nasr, O. Abuzaid, N. Al Qahtani, T. Sebastian and R. Metwally, The Effect of Dietary Intake of Vitamin D on Gestational Diabetes Mellitus, *Nutr Metab Insights*, 2020, **13**, 1178638820932164.
3. T. H. Lo, T. Y. Wu, P. C. Li and D. C. Ding, Effect of Vitamin D supplementation during pregnancy on maternal and perinatal outcomes, *Tzu Chi Medical Journal*, 2019, **31**, 201-206.
4. F. M. Loudyi, J. Kassouati, M. Kabiri, N. Chahid, A. Kharbach, H. Aguenou and A. Barkat, Vitamin D status in Moroccan pregnant women and newborns: reports of 102 cases, *Pan Afr Med J*, 2016, **24**, 170.
5. U. K. Møller, S. Streym, L. Heckendorff, L. Mosekilde and L. Rejnmark, Effects of 25OHD concentrations on chances of pregnancy and pregnancy outcomes: A cohort study in healthy Danish women, *Eur. J. Clin. Nutr.*, 2012, **66**, 862-868.
6. S. S. Fatima, M. A. Maqbool, A. Syed and F. Alam, Low vitamin D and risk for small for gestation age babies in gestational diabetes, *International Journal of Diabetes in Developing Countries*, 2018, **38**, 36-41.
7. S. Budhwar, P. Verma, R. Verma, S. Gupta, S. Rai, S. Rajender and K. Singh, Altered cord serum 25-hydroxyvitamin D signaling and placental inflammation is associated with pre-term birth, *Am. J. Reprod. Immunol.*, 2020, **83**.
8. S. N. Karras, H. Fakhoury, G. Muscogiuri, W. B. Grant, J. M. van den Ouweland, A. M. Colao and K. Kotsa, Maternal vitamin D levels during pregnancy and neonatal health: evidence to date and clinical implications, *Therapeutic Advances in Musculoskeletal Disease*, 2016, **8**, 124-135.
9. S. L. Mumford, R. A. Garbose, K. Kim, K. Kissell, D. L. Kuhr, U. R. Omosigho, N. J. Perkins, N. Galai, R. M. Silver, L. A. Sjaarda, T. C. Plowden and E. F. Schisterman, Association of preconception serum 25-hydroxyvitamin D concentrations with livebirth and pregnancy loss: a prospective cohort study, *The Lancet Diabetes and Endocrinology*, 2018, **6**, 725-732.
10. Yusrawati, M. Idaman and N. I. Liputo, Third trimester maternal 1,25-dihydroxyvitamin D and neonatal birth weight, *Paediatr. Indones.*, 2017, **57**, 67-69.
11. P. E. Watson and B. W. McDonald, The association of maternal diet and dietary supplement intake in pregnant New Zealand women with infant birthweight, *Eur. J. Clin. Nutr.*, 2010, **64**, 184-193.
12. N. Rezavand, S. Tabarok, Z. Rahimi, A. Vaisi-Raygani, E. Mohammadi and Z. Rahimi, The effect of VDR gene polymorphisms and vitamin D level on blood pressure, risk of preeclampsia, gestational age, and body mass index, *J. Cell. Biochem.*, 2019, **120**, 6441-6448.
13. B. B. Dong, M. M. Zhi, M. M. Han, H. Lin, H. Yu and L. Li, The relationship between vitamin D and insulin resistance before delivery in advanced maternal age, *Reprod. Biol. Endocrinol.*, 2019, **17**.
14. R. Wierzejska, M. Jarosz, M. Klemińska-Nowak, M. Tomaszewska, W. Sawicki, M. Bachanek and M. Siuba-Strzelińska, Maternal and Cord Blood Vitamin D Status and Anthropometric Measurements in Term Newborns at Birth, *Front Endocrinol (Lausanne)*, 2018, **9**, 9.
15. G. A. Paxton, G. R. Teale, C. A. Nowson, R. S. Mason, J. J. McGrath, M. J. Thompson, A. Siafarikas, C. P. Rodda and C. F. Munns, Vitamin D and health in pregnancy, infants, children and adolescents in Australia and New Zealand: a position statement, *Med. J. Aust.*, 2013, **198**, 142-143.
16. A. Dovnik, F. Mujezinovic, M. Treiber, B. P. Balon, M. Gorenjak, U. Maver and I. Takac, Determinants of maternal vitamin D concentrations in Slovenia A prospective observational study, *Wien. Klin. Wochenschr.*, 2017, **129**, 21-28.
17. W. B. Grant, Adequate vitamin D during pregnancy reduces the risk of premature birth by reducing placental colonization by bacterial vaginosis species, *mBio*, 2011, **2**, e00022-00011.
18. J. A. Tamblyn, C. Jenkinson, D. P. Larner, M. Hewison and M. D. Kilby, Serum and urine vitamin D metabolite analysis in early preeclampsia, *Endocrine Connections*, 2018, **7**, 199-210.
19. B. W. Hollis and C. L. Wagner, Vitamin D and pregnancy: Skeletal effects, nonskeletal effects, and birth outcomes, *Calcif. Tissue Int.*, 2013, **92**, 128-139.
20. C. Casey, A. McGinty, V. A. Holmes, C. C. Patterson, I. S. Young and D. R. McCance, Maternal vitamin D and neonatal anthropometrics and markers of neonatal glycaemia: Belfast Hyperglycemia and Adverse Pregnancy Outcome (HAPO) study, *Br. J. Nutr.*, 2018, **120**, 74-80.
21. A. Dovnik and F. Mujezinović, The association of vitamin D levels with common pregnancy complications, *Nutrients*, 2018, **10**.

## Supporting Information

---

22. S. Hong-Bi, X. Yin, Y. Xiaowu, W. Ying, X. Yang, C. Ting and W. Na, High prevalence of vitamin D deficiency in pregnant women and its relationship with adverse pregnancy outcomes in Guizhou, China, *J. Int. Med. Res.*, 2018, **46**, 4500-4505.
23. N. Li, H. M. Wu, F. Hang, Y. S. Zhang and M. J. Li, Women with recurrent spontaneous abortion have decreased 25(OH) vitamin D and VDR at the fetal-maternal interface, *Braz. J. Med. Biol. Res.*, 2017, **50**, e6527.
24. Y. Liu, Q. Jin, Y. Bao, S. Li, J. Wang and L. Qiu, Investigation of the vitamin D nutritional status in women with gestational diabetes mellitus in Beijing, *Lipids Health Dis.*, 2017, **16**, 1-5.
25. W. Bao, Y. Song, K. A. Bertrand, D. K. Tobias, S. F. Olsen, J. E. Chavarro, J. L. Mills, F. B. Hu and C. Zhang, Prepregnancy habitual intake of vitamin D from diet and supplements in relation to risk of gestational diabetes mellitus: A prospective cohort study, *J. Diabetes*, 2018, **10**, 373-379.
26. L. M. Bodnar and H. N. Simhan, Vitamin D may be a link to black-white disparities in adverse birth outcomes, *Obstet. Gynecol. Surv.*, 2010, **65**, 273-284.
27. C. A. Mannion, K. Gray-Donald and K. G. Koski, Association of low intake of milk and vitamin D during pregnancy with decreased birth weight, *CMAJ*, 2006, **174**, 1273-1277.
28. N. K. Hyde, S. L. Brennan-Olsen, J. D. Wark, S. M. Hosking and J. A. Pasco, Maternal Dietary Nutrient Intake During Pregnancy and Offspring Linear Growth and Bone: The Vitamin D in Pregnancy Cohort Study, *Calcif. Tissue Int.*, 2017, **100**, 47-54.
29. O. G. Brooke, F. Butters and C. Wood, Intrauterine vitamin D nutrition and postnatal growth in Asian infants, *Br. Med. J. (Clin. Res. Ed.)*, 1981, **283**, 1024.
30. B. Bhowmik, T. Siddique, A. Majumder, I. Mdala, I. A. Hossain, Z. Hassan, I. Jahan, N. C. D. V. Moreira, A. Alim, A. Basit, G. A. Hitman, A. K. A. Khan and A. Hussain, Maternal BMI and nutritional status in early pregnancy and its impact on neonatal outcomes at birth in Bangladesh, *BMC Pregnancy Childbirth*, 2019, **19**.
31. S. Kabaran and A. Ayaz, Effects of vitamins B12, folic acid, A, D, E and C on maternal and fetal health, *Turk Hijyen ve Deneysel Biyoloji Dergisi*, 2013, **70**, 103-112.
32. S. Bond, Low Levels of Vitamin D in Women Increase the Risk of Preeclampsia, *J. Midwifery Womens Health*, 2008, **53**, 395.
33. S. Saha and S. Saha, The risk of morbidities in newborns of antenatal vitamin D supplemented gestational diabetes mellitus patients, *Int J Health Sci (Qassim)*, 2020, **14**, 3-17.
34. A. S. Aji, E. Erwinda, R. Rasyid, Y. Yusrawati, S. G. Malik, B. Alathari, J. A. Lovegrove, N. I. Lipoeto and K. S. Vimalaswaran, A genetic approach to study the relationship between maternal Vitamin D status and newborn anthropometry measurements: the Vitamin D pregnant mother (VDPM) cohort study, *Journal of Diabetes and Metabolic Disorders*, 2020, **19**, 91-103.
35. A. L. Vestergaard, S. Justesen, T. Volqvartz, S. K. Aagaard, M. F. Andreassen, I. Lesnikova, N. Ulbjerg, A. Larsen and P. Bor, Vitamin D insufficiency among Danish pregnant women—Prevalence and association with adverse obstetric outcomes and placental vitamin D metabolism, *Acta Obstet. Gynecol. Scand.*, 2021, DOI: 10.1111/aogs.14019.
36. M. I. Ullah, L. Shamsuddin, S. Tamanna and S. Rouf, Association of preeclampsia and eclampsia with vitamin d deficiency: Study findings from patients in a tertiary care hospital in Bangladesh, *Int. J. Gynecol. Obstet.*, 2012, **119**, S781-S782.
37. A. Olmos-Ortiz, E. Avila, M. Durand-Carbajal and L. Diaz, Regulation of calcitriol biosynthesis and activity: Focus on gestational vitamin D deficiency and adverse pregnancy outcomes, *Nutrients*, 2015, **7**, 443-480.
38. H. K. Yoon, Gestational diabetes mellitus, fetal growth and vitamin D, *Journal of Bone Metabolism*, 2017, **24**, 155-159.
39. S. D. Thomas, A. N. Fudge, M. Whiting and P. S. Coates, The correlation between third-trimester maternal and newborn-serum 25-hydroxy-vitamin D in a selected South Australian group of newborn samples, *BMJ Open*, 2011, **1**, e000236.
40. M. Velkavrh, D. Paro-Panjan, E. Benedik, N. F. Mis, U. Godnov and A. S. Salamon, The Influence of Maternal Levels of Vitamin D and Adiponectin on Anthropometrical Measures and Bone Health in Offspring, *Pril (Makedon Akad Nauk Umjet Odd Med Nauki)*, 2019, **40**, 91-98.
41. J. J. McGrath, D. Keeping, S. Saha, D. C. Chant, D. E. Lieberman and M. J. O'Callaghan, Seasonal fluctuations in birth weight and neonatal limb length; does prenatal vitamin D influence neonatal size and shape?, *Early Hum. Dev.*, 2005, **81**, 609-618.
42. M. H. Dabbaghmanesh, S. Forouhari, S. Z. Ghaemi, A. Khakshour and S. Rad, Comparison of 25-hydroxyvitamin D and calcium levels between preeclampsia and normal pregnant women and birth outcomes, *International Journal of Pediatrics*, 2015, **3**, 1047-1055.

## Supporting Information

---

43. A. A. Sonuga and O. O. Sonuga, Hypovitaminosis D Is Associated with Some Metabolic Indices in Gestational Diabetes Mellitus, *Biomedicine Hub*, 2020, **5**.
44. M. Krenz-Niedbała, E. A. Puch and K. Kościński, Season of birth and subsequent body size: the potential role of prenatal vitamin D, *Am. J. Hum. Biol.*, 2011, **23**, 190-200.
45. L. Sletner, K. Mørkrid, B. Nakstad, K. I. Birkeland and A. K. Jenum, Levels of 25-OH-vitamin D in early pregnancy in women from five ethnic groups with and without gestational diabetes, *Diabetologia*, 2010, **53**, S149.
46. H. P. Rutz, Hypovitaminosis D, insulin resistance and hypertension in pregnancy, *Eur. J. Clin. Nutr.*, 2005, **59**, 805-806.
47. I. Amirlak, M. Ezimokhai, A. Dawodu, K. P. Dawson, J. Kochiyil, L. Thomas and A. M. Abdulle, Current maternal-infant micronutrient status and the effects on birth weight in the United Arab Emirates, *East. Mediterr. Health J.*, 2009, **15**, 1399-1406.
48. Y. Agudelo-Zapata, L. M. Maldonado-Acosta, H. F. Sandoval-Alzate, N. E. Poveda, M. F. Garcés, J. A. Cortés-Vásquez, A. F. Linares-Vaca, C. A. Mancera-Rodríguez, S. A. Perea-Ariza, K. Y. Ramírez-Iriarte, C. A. Castro-Saldarriaga, J. M. Arteaga-Díaz, R. Franco-Vega, E. Ángel-Müller, A. J. Parada-Baños and J. E. Caminos, Serum 25-hydroxyvitamin D levels throughout pregnancy: A longitudinal study in healthy and preeclamptic pregnant women, *Endocrine Connections*, 2018, **7**, 698-707.
49. K. Quack Lötscher, Impact of vitamin D during pregnancy on maternal health, *Gynakologe*, 2015, DOI: 10.1007/s00129-014-3500-3.
50. S. Triunfo, A. Lanzone and P. G. Lindqvist, Low maternal circulating levels of vitamin D as potential determinant in the development of gestational diabetes mellitus, *J. Endocrinol. Invest.*, 2017, **40**, 1049-1059.
51. A. Vellinga, A. Zawiejska, J. Harreiter, B. Buckley, G. Di Cianni, A. Lapolla, R. Corcoy, D. Simmons, J. M. Adelantado, P. Damm, G. Desoye, R. Devlieger, D. Hill, A. Kautzky-Willer, M. Klemetti, E. Mathiesen, P. Rebollo, F. Snoek, M. Tikkanen, D. Timmerman, A. van Assche, M. van Poppel, E. Wender-Oegowska and F. Dunne, Associations of Body Mass Index (Maternal BMI) and Gestational Diabetes Mellitus with Neonatal and Maternal Pregnancy Outcomes in a Multicentre European Database (Diabetes and Pregnancy Vitamin D and Lifestyle Intervention for Gestational Diabetes Mellitus Prevention), *ISRN Obes*, 2012, **2012**, 424010.
52. S. Triunfo and A. Lanzone, Potential impact of maternal Vitamin D status on obstetric well-being, *J. Endocrinol. Invest.*, 2016, **39**, 37-44.
53. P. J. Liu, A. M. Yao, L. K. Ma, X. Y. Chen, S. L. Yu, Y. P. Liu and Y. X. Hou, Associations of Serum Selenium Levels in the First Trimester of Pregnancy with the Risk of Gestational Diabetes Mellitus and Preterm Birth: a Preliminary Cohort Study, *Biol. Trace Elem. Res.*, 2021, **199**, 527-534.
54. N. Principi, S. Bianchini, E. Baggi and S. Esposito, Implications of maternal vitamin D deficiency for the fetus, the neonate and the young infant, *Eur. J. Nutr.*, 2013, **52**, 859-867.
55. C. R. Thomsen, I. Milidou, L. Hvidman, M. R. Khalil, L. Rejnmark and N. Uldbjerg, Vitamin D and the risk of dystocia: A case-control study, *PLoS ONE*, 2020, **15**, e0240406.
56. Z. Liu, H. Liu, X. Xu, S. Luo, J. Liu, C. Jin, N. Han and H. J. Wang, Combined Effect of Maternal Vitamin D Deficiency and Gestational Diabetes Mellitus on Trajectories of Ultrasound-Measured Fetal Growth: A Birth Cohort Study in Beijing, China, *J. Diabetes Res.*, 2020, **2020**.
57. W. Hou, X. T. Yan, C. M. Bai, X. W. Zhang, L. Y. Hui and X. W. Yu, Decreased serum Vitamin D levels in early spontaneous pregnancy loss, *Eur. J. Clin. Nutr.*, 2016, **70**, 1004-1008.
58. S. Tapan and E. Sertoglu, Assessing Vitamin D status in infants with very low birth weight, *J. Matern. Fetal Neonatal Med.*, 2016, **29**, 504.
59. E. G. Aydeniz, U. Sari, I. Tekin and T. U. K. Dilek, The Relationship between First Trimester 25-Hydroxyvitamin D3 Levels and Second Trimester Femur Length and Their Effects on Birth Weight and Length at Birth: A Preliminary Study, *Obstet Gynecol Int*, 2019, **2019**, 3846485.
60. G. K. Swamy, M. E. Garrett, M. L. Miranda and A. E. Ashley-Koch, Maternal vitamin D receptor genetic variation contributes to infant birthweight among black mothers, *American Journal of Medical Genetics, Part A*, 2011, **155**, 1264-1271.
61. N. Wibowo, R. Irwinda and Y. Handoko, Vitamin D3 levels in the maternal serum, cord blood, and placenta of preeclamptic pregnant women, *Medical Journal of Indonesia*, 2020, **29**, 149-153.
62. M. K. Horan, C. A. McGowan, E. R. Gibney, J. M. Donnelly and F. M. McAuliffe, The association between maternal dietary micronutrient intake and neonatal anthropometry - Secondary analysis from the ROLO study, *Nutr. J.*, 2015, **14**.
63. J. Kaludjerovic and R. Vieth, Relationship between vitamin D during perinatal development and health, *J. Midwifery Womens Health*, 2010, **55**, 550-560.



## Supporting Information

---

64. E. C. Francis, S. N. Hinkle, Y. Song, S. Rawal, S. R. Donnelly, Y. Zhu, L. Chen and C. Zhang, Longitudinal Maternal Vitamin D Status during Pregnancy Is Associated with Neonatal Anthropometric Measures, *Nutrients*, 2018, **10**.
65. H. Boskabadi, G. Mamoori, S. F. Khatami and R. Faramarzi, Serum level of vitamin D in preterm infants and its association with premature-related respiratory complications: a case-control study, *Electron Physician*, 2018, **10**, 6208-6214.
66. A. Kazemi, F. Sharifi, N. Jafari and N. Mousavinasab, High prevalence of vitamin D deficiency among pregnant women and their newborns in an Iranian population, *J Womens Health (Larchmt)*, 2009, **18**, 835-839.
67. E. Larqué, E. Morales, R. Leis and J. E. Blanco-Carnero, Maternal and Foetal Health Implications of Vitamin D Status during Pregnancy, *Ann. Nutr. Metab.*, 2018, **72**, 179-192.
68. G. A. Hitman, Vitamin D, diabetic neuropathy and supplementation post-gestational diabetes, *Diabet. Med.*, 2012, **29**, 1.
69. D. E. Roth, S. K. Morris, S. Zlotkin, A. D. Gernand, T. Ahmed, S. S. Shanta, E. Papp, J. Korsiak, J. Shi, M. Munirul Islam, I. Jahan, F. K. Keya, A. R. Willan, R. Weksberg, M. Mohsin, Q. S. Rahman, P. S. Shah, K. E. Murphy, J. Stimec, L. G. Pell, H. Qamar and A. Al Mahmud, Vitamin D Supplementation in Pregnancy and Lactation and Infant Growth, *Obstet. Gynecol. Surv.*, 2019, **74**, 1-2.
70. E. Hyppönen, Preventing vitamin D deficiency in pregnancy - Importance for the mother and child, *Ann. Nutr. Metab.*, 2011, **59**, 28-31.
71. C. U. P. Esmeraldo, M. E. P. Martins, E. R. Maia, J. L. A. Leite, J. L. S. Ramos, J. Gonçalves, Jr., C. M. Neta, F. I. Suano-Souza and R. O. S. Sarni, Vitamin D in Term Newborns: Relation with Maternal Concentrations and Birth Weight, *Ann. Nutr. Metab.*, 2019, **75**, 39-46.
72. N. S. Boghossian, W. Koo, A. Liu, S. L. Mumford, M. Y. Tsai and E. H. Yeung, Longitudinal measures of maternal vitamin D and neonatal body composition, *Eur. J. Clin. Nutr.*, 2019, **73**, 424-431.
73. H. H. Burris and C. A. Camargo, Jr., Vitamin D and gestational diabetes mellitus, *Curr. Diab. Rep.*, 2014, **14**, 451.
74. A. B. Orvik, M. R. Andersen, P. S. Bratholm, K. K. Hedengran, C. Ritz, S. Stender and P. B. Szecsi, Variation in plasma 25-hydroxyvitamin D<sub>2</sub> and D<sub>3</sub> in normal pregnancy with gestational age, sampling season, and complications: A longitudinal cohort study, *PLoS ONE*, 2020, **15**.
75. A. Prentice, L. M. Jarjou, G. R. Goldberg, J. Bennett, T. J. Cole and I. Schoenmakers, Maternal plasma 25-hydroxyvitamin D concentration and birthweight, growth and bone mineral accretion of Gambian infants, *Acta Paediatr.*, 2009, **98**, 1360-1362.
76. R. T. D. Judistiani, T. H. Madjid, S. Irianti, Y. A. Natalia, A. R. Indrati, M. Ghazali, Y. Sribudiani, T. Yuniati, R. Abdulah and B. Setiabudiawan, Association of first trimester maternal vitamin D, ferritin and hemoglobin level with third trimester fetal biometry: result from cohort study on vitamin D status and its impact during pregnancy and childhood in Indonesia, *BMC Pregnancy Childbirth*, 2019, **19**, 112.
77. S. Kaptanis, L. Chetouani, S. Damle and B. Ajay, Vitamin D supplementation for the prevention of pre-eclampsia? 'First do no harm', *BJOG*, 2012, **119**, 1417.
78. P. Domaracki, P. Sadlecki, G. Odrowaz-Sypniewska, E. Dzikowska, P. Walentowicz, J. Siodmiak, M. Grabiec and M. Walentowicz-Sadlecka, Serum 25(OH) vitamin D levels in polishwomen during pregnancies complicated by hypertensive disorders and gestational diabetes, *Int. J. Mol. Sci.*, 2016, **17**.
79. D. B. Shor, J. Barzel, E. Tauber and H. Amital, The effects of maternal vitamin D on neonatal growth parameters, *Eur. J. Pediatr.*, 2015, **174**, 1169-1174.
80. R. X. Tao, D. H. Meng, J. J. Li, S. L. Tong, J. H. Hao, K. Huang, F. B. Tao and P. Zhu, Current Recommended Vitamin D Prenatal Supplementation and Fetal Growth: Results From the China-Anhui Birth Cohort Study, *J. Clin. Endocrinol. Metab.*, 2018, **103**, 244-252.
81. Y. Tian, C. Holzman, A. M. Siega-Riz, M. A. Williams, N. Dole, D. A. Enquobahrie and C. D. Ferre, Maternal Serum 25-Hydroxyvitamin D Concentrations during Pregnancy and Infant Birthweight for Gestational Age: A Three-Cohort Study, *Paediatr. Perinat. Epidemiol.*, 2016, **30**, 124-133.
82. J. Rutkowska, E. Bandurska-Stankiewicz, D. Wiatr-Bykowska, K. Myszka-Podgórska, E. Kuglarz and W. Matuszewski, Vitamin D deficiency in women with gestational diabetes mellitus, *Clinical Diabetology*, 2016, **5**, 57-61.
83. P. M. Rudnicki and L. Mølsted-Pedersen, Effect of 1,25-dihydroxycholecalciferol on glucose metabolism in gestational diabetes mellitus, *Diabetologia*, 1997, **40**, 40-44.
84. R. Hemalatha, V. C. Anchoju, V. Donugama, H. Nallagatla, D. Parasannanavar, S. Madabushi, T. Bhukya and R. S. Mamidi, Maternal Vitamin D Status and Neonatal Outcomes, *Indian J. Pediatr.*, 2018, **85**, 403-404.

## Supporting Information

---

85. S. J. Genuis, Maternal and Pediatric Health Outcomes in relation to Gestational Vitamin D Sufficiency, *Obstet Gynecol Int*, 2015, **2015**, 501829.
86. C. B. Jensen, T. L. Berentzen, M. Gamborg, T. I. Sørensen and B. L. Heitmann, Does prenatal exposure to vitamin D-fortified margarine and milk alter birth weight? A societal experiment, *Br. J. Nutr.*, 2014, **112**, 785-793.
87. M. Pereira-Santos, G. Q. Carvalho, I. D. Louro, D. B. dos Santos and A. M. Oliveira, Polymorphism in the vitamin D receptor gene is associated with maternal vitamin D concentration and neonatal outcomes: A Brazilian cohort study, *Am. J. Hum. Biol.*, 2019, **31**.
88. S. E. Bennett, J. McPeake, D. R. McCance, J. G. Manderson, P. Johnston, R. McGalliard and A. McGinty, Maternal Vitamin D Status in Type 1 Diabetic Pregnancy: Impact on Neonatal Vitamin D Status and Association with Maternal Glycaemic Control, *PLoS ONE*, 2013, **8**.
89. M. Hewison and J. S. Adams, Vitamin D insufficiency and skeletal development in utero, *J. Bone Miner. Res.*, 2010, **25**, 11-13.
90. M. Y. Yakoob, Vitamin d deficiency during pregnancy and the risk of preeclampsia, *Journal of the Pakistan Medical Association*, 2011, **61**, 827-828.
91. A. R. Martineau and K. Khan, Maternal vitamin D insufficiency is associated with adverse pregnancy and neonatal outcomes, *Evid. Based Med.*, 2014, **19**, e4.
92. C. Zera, E. Seely, A. Litonjua, L. Wilkins-Haug, J. Rich-Edwards, S. Weiss, T. McElrath and J. Stuart, First and third trimester plasma vitamin D, angiogenic factors, and preeclampsia, *Am. J. Obstet. Gynecol.*, 2011, **204**, S227-S228.
93. H. H. Burris, S. L. Rifas-Shiman, C. A. Camargo Jr, A. A. Litonjua, S. Y. Huh, J. W. Rich-Edwards and M. W. Gillman, Vitamin D deficiency in pregnancy is associated with gestational diabetes, *Obesity*, 2011, **19**, S208.
94. I. E. Zazerskaya, L. V. Shirinyan, L. V. Kuznetsova, L. V. Barabanova and E. S. Shelepova, Deficiency of vitamin D and gestational complications according to research data in Saint Petersburg, Russian Federation, *Gynecol. Endocrinol.*, 2016, **32**, 171-172.
95. B. Yılmaz, C. Aygün and E. Çetinoğlu, Vitamin D levels in newborns and association with neonatal hypocalcemia, *J. Matern. Fetal Neonatal Med.*, 2018, **31**, 1889-1893.
96. L. Yang, L. G. Song, Y. H. Wang and D. Zhao, Influence of Vitamin D level in the second trimester of pregnancy on the complications of Chinese pregnant women and fetuses, *Reproductive and Developmental Medicine*, 2017, **1**, 77-79.
97. C. Würtz, P. Gilbert, W. Baier and C. Kunz, Vitamin D in pregnant german women and their newborns, *Breastfeed. Med.*, 2012, **7**, 576.
98. L. Wetta, J. Biggio, S. Cliver, A. Abramovici, S. Barnes and A. Tita, Midtrimester vitamin D status is not associated with preeclampsia prior to 37 weeks, *Am. J. Obstet. Gynecol.*, 2012, **206**, S346-S347.
99. L. Wetta, J. Biggio, S. Cliver, A. Abramovici, S. Barnes and A. Tita, Midtrimester Vitamin D status is not associated with spontaneous preterm birth prior to 35 weeks, *Am. J. Obstet. Gynecol.*, 2012, **206**, S229-S230.
100. S. T. Weiss, Does vitamin D given during pregnancy reduce preterm birth and pre-eclampsia?, *Birth Defects Research Part A - Clinical and Molecular Teratology*, 2012, **94**, 300.
101. S. Q. Wei, H. P. Qi, K. Sarafin, Z. C. Luo, P. Julien, F. Audibert and W. D. Fraser, Associations of plasma 25-hydroxyvitamin D levels with endothelial function and preeclampsia, *Am. J. Obstet. Gynecol.*, 2013, **208**, S38.
102. S. Q. Wei, A. M. Nuyt, L. Leduc, Z. C. Luo, F. Audibert and W. Fraser, Prenatal vitamin d status and neonatal outcomes, *Reproductive Sciences*, 2016, **23**, 113A.
103. S. Q. Wei, Z. C. Luo and W. Fraser, Maternal obese, vitamin d status and risk of preeclampsia, *Am. J. Epidemiol.*, 2013, **177**, S21.
104. S. Q. Wei, P. Julien, Z. C. Luo, F. Audibert and W. Fraser, Vitamin D receptor gene polymorphisms and risk of preeclampsia, *Am. J. Epidemiol.*, 2012, **175**, S79.
105. S. Wei, J. F. Bilodeau, P. Julien, A. M. Nuyt, Z. C. Luo, F. Audibert and W. Fraser, Association of maternal vitamin D status and oxidative stress during pregnancy and risk of preeclampsia, *Am. J. Obstet. Gynecol.*, 2014, **210**, S169-S170.
106. Y. Wang, T. Wang, Y. Huo, L. Liu, S. Liu, X. Yin, R. Wang and X. Gao, Placenta expression of vitamin D and related genes in pregnant women with gestational diabetes mellitus, *J. Steroid Biochem. Mol. Biol.*, 2020, **204**.
107. M. Walsh, L. Bärebring and H. Augustin, Avoiding maternal vitamin D deficiency may lower blood glucose in pregnancy, *J. Steroid Biochem. Mol. Biol.*, 2019, **186**, 117-121.

## Supporting Information

---

108. J. Walsh, M. Kilbane, R. Mahony, M. Foley, M. McKenna and F. McAuliffe, Impact of maternal and fetal adiposity on maternal and fetal vitamin D, *Am. J. Obstet. Gynecol.*, 2012, **206**, S115.
109. K. von Websky, A. A. Hasan, C. Reichetzeder, O. Tsuprykov and B. Hocher, Impact of vitamin D on pregnancy-related disorders and on offspring outcome, *J. Steroid Biochem. Mol. Biol.*, 2018, **180**, 51-64.
110. A. J. Vivanti, I. Monier, E. Salakos, C. Elie, V. Tsatsaris, M. V. Senat, J. Jani, J. M. Jouannic, N. Winer, J. Zeitlin, C. Mougneaud, J. C. Souberbielle, M. Courbebaisse and A. Benachi, Vitamin D and pregnancy outcomes: Overall results of the FEPED study, *Journal of Gynecology Obstetrics and Human Reproduction*, 2020, **49**.
111. V. Vij, V. Gupta, S. Balan and S. Kaul, Study to find out the prevalence of Vitamin D deficiency in cord blood, *Arch. Dis. Child.*, 2017, **102**, A189.
112. A. J. Valkama, J. M. Meirilä, S. B. Koivusalo, J. Lindström, K. Rönö, A. E. Tiitinen, B. Stach-Lempinen, H. J. Kautiainen, H. Viljakainen, S. Andersson and J. G. Eriksson, Body size modifies the relationship between maternal serum 25-hydroxyvitamin D concentrations and gestational diabetes in high-risk women, *Eur. J. Clin. Nutr.*, 2018, **72**, 460-463.
113. J. M. Thorp and C. A. Camargo, Vitamin D, fish consumption and preterm birth: Is there a link, *Reproductive Sciences*, 2011, **18**, 315A-316A.
114. A. M. Stuebe, A. Wise, K. Boggess, A. H. Herring and A. M. Siega-Riz, Vitamin D-associated polymorphisms and hypertensive complications of pregnancy, *Reproductive Sciences*, 2011, **18**, 170A-171A.
115. M. Stougaard, P. Damm, P. Frederiksen and B. L. Heitmann, Interuterine exposure to extra vitamin D from fortified margarine and later risk of preeclampsia, *Pregnancy Hypertension*, 2016, **6**, 150.
116. B. L. Specker, Does vitamin D during pregnancy impact offspring growth and bone?, *Proc. Nutr. Soc.*, 2012, **71**, 38-45.
117. M. Skouroliakou, D. Ntountaniotis, P. Massara and K. Koutri, Investigation of multiple factors which may contribute to Vitamin D levels of bedridden pregnant women and their preterm neonates, *J. Matern. Fetal Neonatal Med.*, 2016, **29**, 2596-2601.
118. R. Singh, Vitamin D status in preeclamptic and non preeclamptic pregnant women: Indian data, *Int. J. Gynecol. Obstet.*, 2018, **143**, 214-215.
119. K. A. Singh, J. Minium, L. H. Presley, S. B. Amini, S. Hauguel-de Mouzon and P. M. Catalano, The relationship between cord blood vitamin D and neonatal body composition, *Reproductive Sciences*, 2011, **18**, 143A-144A.
120. M. Shibata, A. Suzuki, T. Sekiya, S. Sekiguchi, S. Asano, Y. Udagawa and M. Itoh, High prevalence of hypovitaminosis D in Japanese pregnant women with threatened premature delivery, *J. Bone Miner. Res.*, 2010, **25**, S460.
121. E. Naghshineh and S. Sheikhalian, Effect of vitamin D supplementation in the reduce risk of preeclampsia in nulliparous women, *Adv Biomed Res*, 2016, **5**, 7.
122. P. Mokarram, G. Rahmannedhad, M. Erfani, M. R. Rezvanfar and F. Jalali Mashayekhi, Study of vitamin D receptor gene methylation and the risk of gestational diabetes mellitus in Iranian pregnant women, *Gene Reports*, 2021, **22**.
123. S. L. McDonnell, C. A. Baggerly, J. L. Aliano, C. B. French, C. L. Wagner, S. A. Sullivan and R. B. Newman, Prenatal correction of vitamin D deficiency is associated with substantial reduction in preterm birth, *Am. J. Obstet. Gynecol.*, 2018, **218**, S428-S429.
124. R. K. Marwaha, N. Tandon, S. Chopra, N. Agarwal, M. K. Garg, B. Sharma, R. S. Kanwar, K. Bhadra, S. Singh, K. Mani and S. Puri, Vitamin D status in pregnant Indian women across trimesters and different seasons and its correlation with neonatal serum 25-hydroxyvitamin D levels, *Br. J. Nutr.*, 2011, **106**, 1383-1389.
125. C. B. Martin, B. T. Oshiro, L. D. Sands, S. Kabir, D. Thorpe, T. C. Clark, R. Yao and E. Mata-Greenwood, Vitamin-D dysregulation in early- and late-onset preeclampsia: A gestational-age matched study, *J. Steroid Biochem. Mol. Biol.*, 2020, **203**.
126. M. C. Magnus, K. Miliku, D. A. Lawlor, J. F. Felix, V. W. V. Jaddoe, C. Bonilla and A. Fraser, Association of vitamin D concentrations with gestational hypertension and pre-eclampsia: A Mendelian randomisation analysis, *The Lancet*, 2016, **388**, 72.
127. S. Lykkedegn, S. S. Beck-Nielsen, G. L. Sorensen, L. B. Andersen, P. B. N. Fruekilde, J. Nielsen, H. B. Kyhl, J. S. Joergensen, S. Husby and H. T. Christesen, Vitamin D supplementation, cord 25-hydroxyvitamin D and birth weight: Findings from the Odense Child Cohort, *Clin. Nutr.*, 2017, **36**, 1621-1627.
128. F. Liu, W. Hou, J. Tang, J. Lu, R. He and W. Jia, Serum vitamin D levels in gestational diabetes mellitus patients and its relationship with islet cell function, *Diabetes*, 2016, **65**, A589.

## Supporting Information

---

129. D. A. Lawlor, A. K. Wills, A. Fraser, A. Sayers, W. D. Fraser and J. H. Tobias, Association of maternal vitamin D status during pregnancy with bone-mineral content in offspring: a prospective cohort study, *Lancet*, 2013, **381**, 2176-2183.
130. E. Larqué and J. E. Blanco-Carnero, Vitamin D levels during pregnancy and fetal implications, *Ann. Nutr. Metab.*, 2017, **71**, 167-168.
131. S. A. Lanham, C. Roberts, A. K. Habgood, S. Alexander, T. H. Burne, D. W. Eyles, C. N. Trueman, M. Cooper, J. J. McGrath and R. O. Oreffo, Effect of vitamin D deficiency during pregnancy on offspring bone structure, composition and quality in later life, *J Dev Orig Health Dis*, 2013, **4**, 49-55.
132. M. Lacroix, M. C. Battista, M. Doyon, M. F. Hivert and P. Perron, Lower levels of vitamin D at first trimester of pregnancy are associated with higher risk of developing gestational diabetes mellitus, *Diabetologia*, 2012, **55**, S39.
133. G. B. Krishnamurthy, S. Olive, M. Rosenthal and S. Tuck, Vitamin d deficiency and insufficiency; is it a risk factor for gestational diabetes and poorer glycemic control in pre existing diabetes in pregnancy? A hospital based cohort study, *Int. J. Gynecol. Obstet.*, 2012, **119**, S393-S394.
134. I. S. Kochar, V. Vij and A. Sethi, Prevalence of Vitamin D Deficiency in Cord Blood, *Journal of Clinical Neonatology*, 2019, **8**, 10-14.
135. S. K. Kim, K. S. Kim, S. W. Park and Y. W. Cho, Vitamin D deficiency is associated with higher risk of postpartum glucose intolerance in women with gestational diabetes mellitus, *Diabetes Res. Clin. Pract.*, 2014, **106**, S76-S77.
136. H. S. Kim, H. S. Hwang, H. S. Kwon, J. Y. Lim and I. S. Sohn, A comparative analysis of maternal and fetal 25-hydroxyvitamin D in pregnant women with and without gestational diabetes mellitus, *J. Matern. Fetal Neonatal Med.*, 2018, **31**, 2748-2755.
137. H. S. Kim, S. H. Chae, H. S. Kwon, H. S. Hwang and I. S. Sohn, The relationship between maternal and fetal 25-hydroxy vitamin D in pregnant women with gestational diabetes mellitus, *J. Perinat. Med.*, 2015, **43**.
138. A. Kılıcaslan, R. Kutlu, I. Kilinc and D. I. Ozberk, The effects of vitamin D supplementation during pregnancy and maternal vitamin D levels on neonatal vitamin D levels and birth parameters, *J. Matern. Fetal Neonatal Med.*, 2018, **31**, 1727-1734.
139. M. Kiely, S. M. O'Donovan, L. C. Kenny, J. O. Hourihane, A. D. Irvine and D. M. Murray, Vitamin D metabolite concentrations in umbilical cord blood serum and associations with clinical characteristics in a large prospective mother-infant cohort in Ireland, *J. Steroid Biochem. Mol. Biol.*, 2017, **167**, 162-168.
140. A. S. Khashan, M. Kiely, J. Y. Zhang, M. Kinsella and L. C. Kenny, The impact of vitamin d status in early pregnancy on later uteroplacental dysfunction, *Reproductive Sciences*, 2013, **20**, 264A-265A.
141. P. Khandavalli, R. Chawla, H. Punyani and S. Gupta, Hypovitaminosis D in 1st trimester may predict gestational diabetes, *Diabetologia*, 2015, **58**, S486-S487.
142. P. Khandavalli, R. Chawla, H. Punyani and S. Gupta, Hypovitaminosis D in early pregnancy as a predictor of gestational diabetes mellitus, *International Journal of Diabetes in Developing Countries*, 2015, **35**, S554-S557.
143. U. A. Kepkep and A. G. Pekcan, Determination of serum vitamin D status of mothers and newborns and related outcomes, *Proc. Nutr. Soc.*, 2020, **79**.
144. L. C. Kenny, M. Kiely, J. Y. Zhang, M. Kinsella and A. S. Khashan, Vitamin D deficiency increases the risk of spontaneous preterm birth, *Reproductive Sciences*, 2013, **20**, 196A.
145. S. N. Karras, I. Shah, A. Petroczi, D. G. Goulis, H. Bili, F. Papadopoulou, V. Harizopoulou, B. C. Tarlatzis and D. P. Naughton, in *Clinical Nutrition: The Interface Between Metabolism, Diet, and Disease*, 2013, DOI: 10.1201/b16308, pp. 315-334.

**Supporting Information**

**Supplementary Table S4. Quality assessment of cohort studies based on the Newcastle Ottawa scale.**

| Study           | Selection |   |   |   | Comparability |   | Assessment of outcome |   |   | Total score |
|-----------------|-----------|---|---|---|---------------|---|-----------------------|---|---|-------------|
|                 | a         | b | c | d | e             | f | g                     | h | i |             |
| Chen 2020       | 1         | 1 | 1 | 1 | 1             | 1 | 1                     | 1 | 0 | 8           |
| Xu 2018         | 1         | 1 | 1 | 1 | 1             | 1 | 0                     | 1 | 0 | 7           |
| Zhu 2019        | 1         | 1 | 1 | 1 | 1             | 1 | 1                     | 1 | 1 | 9           |
| Yang 2018       | 1         | 1 | 1 | 1 | 0             | 0 | 0                     | 1 | 0 | 5           |
| Al-Ajlan 2018   | 0         | 1 | 1 | 0 | 1             | 1 | 1                     | 1 | 1 | 7           |
| Chen 2020       | 0         | 1 | 1 | 1 | 0             | 0 | 1                     | 0 | 0 | 4           |
| Gernand 2015    | 1         | 1 | 1 | 1 | 0             | 1 | 1                     | 0 | 1 | 7           |
| Hemmingway 2018 | 1         | 1 | 1 | 1 | 0             | 1 | 1                     | 1 | 0 | 7           |
| Yuan 2017       | 1         | 1 | 1 | 1 | 1             | 1 | 1                     | 0 | 1 | 8           |
| Yue 2020        | 1         | 1 | 1 | 1 | 1             | 1 | 1                     | 1 | 0 | 8           |
| Abd Aziz 2020   | 1         | 1 | 1 | 1 | 0             | 0 | 1                     | 1 | 0 | 6           |
| Dwarkanath 2019 | 1         | 1 | 1 | 1 | 1             | 1 | 1                     | 1 | 1 | 9           |
| Li 2020         | 1         | 1 | 1 | 1 | 1             | 0 | 1                     | 1 | 0 | 7           |
| Thiele 2019     | 1         | 1 | 1 | 1 | 0             | 0 | 1                     | 0 | 0 | 5           |



---

**Supporting Information**

---

|                        |   |   |   |   |   |   |   |   |   |   |
|------------------------|---|---|---|---|---|---|---|---|---|---|
| Flood-Nichols 2015     | 1 | 1 | 1 | 1 | 0 | 1 | 1 | 1 | 0 | 7 |
| Davies-Tuck 2015       | 1 | 1 | 1 | 1 | 1 | 1 | 0 | 1 | 0 | 7 |
| Aydogmus 2015          | 1 | 1 | 1 | 1 | 0 | 0 | 1 | 0 | 0 | 5 |
| Arnold 2015            | 1 | 1 | 1 | 1 | 1 | 1 | 1 | 1 | 0 | 8 |
| Alvarez-Fernandez 2015 | 1 | 1 | 1 | 1 | 0 | 0 | 1 | 1 | 1 | 7 |
| Zhou 2014              | 1 | 1 | 1 | 1 | 0 | 0 | 1 | 1 | 0 | 6 |
| Park 2014              | 1 | 1 | 1 | 1 | 1 | 1 | 1 | 1 | 0 | 8 |
| Reichetzeder 2014      | 1 | 1 | 1 | 1 | 0 | 0 | 1 | 0 | 0 | 5 |
| Lacroix 2014           | 1 | 1 | 1 | 1 | 0 | 0 | 1 | 1 | 0 | 6 |
| Scholl 2013            | 1 | 1 | 1 | 1 | 1 | 1 | 1 | 1 | 0 | 8 |
| Wei 2012               | 1 | 1 | 1 | 1 | 1 | 1 | 0 | 1 | 0 | 7 |
| Scholl 2012            | 1 | 1 | 1 | 1 | 1 | 1 | 1 | 1 | 0 | 8 |
| Perez-Ferre 2012       | 1 | 1 | 1 | 1 | 1 | 1 | 0 | 0 | 0 | 6 |
| Fernandez-Alonso 2012  | 1 | 1 | 1 | 1 | 0 | 0 | 1 | 1 | 1 | 7 |
| Burris 2012            | 1 | 1 | 1 | 1 | 1 | 1 | 1 | 0 | 0 | 7 |
| Shand 2010             | 0 | 1 | 1 | 1 | 0 | 0 | 1 | 1 | 1 | 6 |

---

### Supporting Information

---

|             |   |   |   |   |   |   |   |   |   |   |
|-------------|---|---|---|---|---|---|---|---|---|---|
| Haugen 2009 | 1 | 1 | 1 | 1 | 1 | 1 | 1 | 0 | 0 | 7 |
| Yue 2021    | 1 | 1 | 1 | 1 | 1 | 1 | 1 | 1 | 0 | 8 |

---

a. Representativeness of the exposed cohort;

b. Selection of the non-exposed cohort;

c. Ascertainment of exposure;

d. Demonstration that outcome of interest was not present at start of study;

e. Comparability of cohorts on the basis of the design or analysis (adjusted for maternal age);

f. Comparability of cohorts on the basis of the design or analysis (adjusted for maternal pre-pregnancy BMI/weight);

g. Assessment of outcome;

h. Was follow-up long enough for outcomes to occur (maternal 25(OH)D level was measured before 20 weeks);

i. Adequacy of follow-up of cohort (follow up rate  $\geq 80\%$ ).



**Supporting Information**

**Supplementary Table S5. Quality assessment of nested case-control studies based on the Newcastle Ottawa scale.**

| Study          | Selection |   |   |   | Comparability |   | Assessment of exposure |   |   | Total score |
|----------------|-----------|---|---|---|---------------|---|------------------------|---|---|-------------|
|                | a         | b | c | d | e             | f | g                      | h | i |             |
| Al-Shafei 2020 | 1         | 1 | 1 | 1 | 0             | 0 | 1                      | 1 | 0 | 6           |
| Xia 2018       | 1         | 1 | 1 | 1 | 1             | 1 | 1                      | 1 | 0 | 8           |
| Salakos 2021   | 1         | 1 | 1 | 1 | 0             | 0 | 1                      | 1 | 0 | 6           |
| Bozda 2020     | 0         | 1 | 1 | 1 | 0             | 0 | 1                      | 1 | 0 | 5           |
| Benachi 2019   | 1         | 1 | 1 | 1 | 0             | 0 | 0                      | 1 | 0 | 5           |
| Wen 2017       | 1         | 1 | 1 | 1 | 1             | 1 | 1                      | 0 | 1 | 8           |
| Dodds 2016     | 1         | 1 | 1 | 1 | 1             | 1 | 1                      | 1 | 0 | 8           |
| Jain 2015      | 1         | 1 | 1 | 1 | 0             | 0 | 1                      | 1 | 0 | 6           |
| Gidlof 2015    | 1         | 1 | 1 | 1 | 0             | 0 | 1                      | 1 | 0 | 6           |
| Anderson 2015  | 1         | 1 | 1 | 1 | 0             | 0 | 1                      | 1 | 0 | 6           |
| Achkar 2015    | 1         | 1 | 1 | 1 | 1             | 1 | 1                      | 1 | 0 | 8           |
| Wetta 2014     | 1         | 1 | 1 | 1 | 1             | 1 | 1                      | 1 | 1 | 9           |
| Schneuer 2014  | 1         | 1 | 1 | 1 | 1             | 0 | 1                      | 1 | 1 | 8           |
| Parlea 2012    | 1         | 1 | 1 | 1 | 0             | 0 | 0                      | 1 | 0 | 5           |

**Supporting Information**

|              |   |   |   |   |   |   |   |   |   |   |   |
|--------------|---|---|---|---|---|---|---|---|---|---|---|
| Baker 2012   | 1 | 1 | 1 | 1 | 1 | 1 | 1 | 1 | 1 | 0 | 8 |
| Makgoba 2011 | 1 | 1 | 1 | 1 | 0 | 0 | 1 | 1 | 0 | 0 | 6 |
| Azar 2011    | 0 | 1 | 1 | 1 | 0 | 0 | 1 | 1 | 0 | 0 | 5 |
| Powe 2010    | 1 | 1 | 1 | 1 | 0 | 1 | 1 | 1 | 0 | 0 | 7 |
| Baker 2010   | 1 | 1 | 1 | 1 | 1 | 1 | 1 | 1 | 0 | 0 | 8 |
| Zhang 2008   | 1 | 1 | 1 | 1 | 1 | 1 | 1 | 1 | 0 | 0 | 8 |
| Bodnar 2007  | 1 | 1 | 1 | 1 | 0 | 1 | 1 | 0 | 0 | 0 | 6 |

- a. Is the case definition adequate;
- b. Representativeness of the cases;
- c. Selection of the controls;
- d. Definitions of the controls;
- e. Comparability of cohorts on the basis of the design or analysis (adjusted for maternal age);
- f. Comparability of cohorts on the basis of the design or analysis (adjusted for maternal pre-pregnancy BMI/weight);
- g. Assessment of exposure;
- h. Same method of ascertainment for cases and controls;
- i. Non-response rate.

## Supporting Information

**Supplementary Table S6. Sensitivity analyses of maternal 25(OH)D levels and the risk of gestational diabetes mellitus.**

| Study omitted   | Pooled RR (95% CI) | $I^2$ (%) | $P_{\text{heterogeneity}}$ |
|-----------------|--------------------|-----------|----------------------------|
| Chen 2020       | 0.75 (0.65, 0.81)  | 69.3      | <0.001                     |
| Xu 2018         | 0.80 (0.70, 0.91)  | 61.8      | <0.001                     |
| Zhu 2019        | 0.74 (0.64, 0.85)  | 68.9      | <0.001                     |
| Yang 2018       | 0.75 (0.65, 0.87)  | 67.4      | <0.001                     |
| Al-Ajlan 2018   | 0.76 (0.67, 0.87)  | 69.0      | <0.001                     |
| Al-Shafei 2020  | 0.77 (0.67, 0.88)  | 68.7      | <0.001                     |
| Yue 2020        | 0.75 (0.65, 0.86)  | 70.0      | <0.001                     |
| Abd Aziz 2020   | 0.76 (0.66, 0.87)  | 70.0      | <0.001                     |
| Dwarkanath 2019 | 0.77 (0.67, 0.88)  | 69.1      | <0.001                     |
| Li 2020         | 0.73 (0.63, 0.85)  | 64.6      | <0.001                     |
| Xia 2018        | 0.77 (0.67, 0.88)  | 68.9      | <0.001                     |
| Shao 2020       | 0.74 (0.64, 0.85)  | 69.5      | <0.001                     |
| Salakos 2021    | 0.75 (0.66, 0.87)  | 70.0      | <0.001                     |
| Iqbal 2020      | 0.77 (0.67, 0.88)  | 69.1      | <0.001                     |
| Bozda 2020      | 0.76 (0.66, 0.87)  | 69.8      | <0.001                     |
| Griew 2019      | 0.75 (0.65, 0.86)  | 70.0      | <0.001                     |
| Wilson 2018     | 0.76 (0.66, 0.87)  | 69.7      | <0.001                     |
| Eggemoen 2018   | 0.75 (0.65, 0.86)  | 70.0      | <0.001                     |
| Dodds 2016      | 0.76 (0.66, 0.87)  | 69.4      | <0.001                     |
| Boyle 2016      | 0.75 (0.66, 0.86)  | 70.0      | <0.001                     |
| Ates 2016       | 0.75 (0.66, 0.87)  | 70.0      | <0.001                     |
| Rodriguez 2015  | 0.75 (0.65, 0.86)  | 69.9      | <0.001                     |
| Nobles 2015     | 0.75 (0.65, 0.86)  | 69.8      | <0.001                     |
| Jain 2015       | 0.76 (0.67, 0.87)  | 68.8      | <0.001                     |

---

### Supporting Information

---

|                       |                   |      |        |
|-----------------------|-------------------|------|--------|
| Flood-Nichols 2015    | 0.75 (0.66, 0.86) | 69.8 | <0.001 |
| Davies-Tuck 2015      | 0.77 (0.67, 0.88) | 68.4 | <0.001 |
| Arnold 2015           | 0.76 (0.66, 0.87) | 69.9 | <0.001 |
| Zhou 2014             | 0.73 (0.64, 0.84) | 65.9 | <0.001 |
| Park 2014             | 0.75 (0.66, 0.86) | 69.4 | <0.001 |
| Schneuer 2014         | 0.75 (0.66, 0.87) | 70.0 | <0.001 |
| Lacroix 2014          | 0.76 (0.67, 0.88) | 69.4 | <0.001 |
| Parlea 2012           | 0.77 (0.67, 0.88) | 69.2 | <0.001 |
| Fernandez-Alonso 2012 | 0.76 (0.66, 0.87) | 69.9 | <0.001 |
| Baker 2012            | 0.75 (0.66, 0.86) | 70.0 | <0.001 |
| Makgoba 2011          | 0.75 (0.65, 0.86) | 70.0 | <0.001 |
| Zhang 2008            | 0.77 (0.67, 0.88) | 69.3 | <0.001 |

---

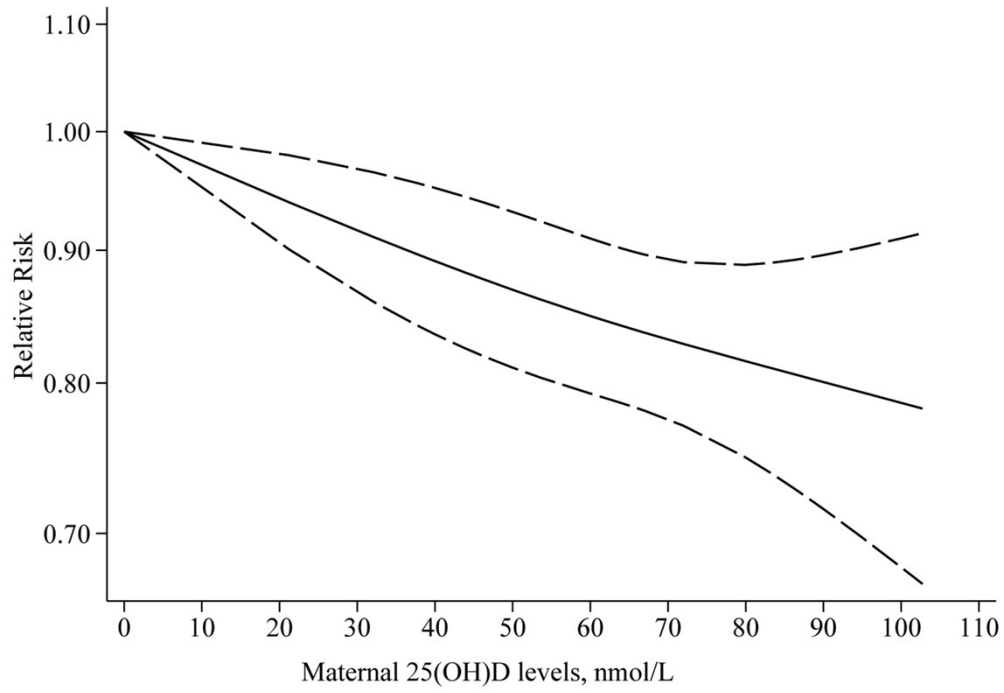

**Supplementary Figure S1. Non-linear dose-response meta-analysis of maternal 25(OH)D levels and risk of GDM ( $P_{\text{non-linearity}} = 0.695$ ). GDM, gestational diabetes mellitus.**

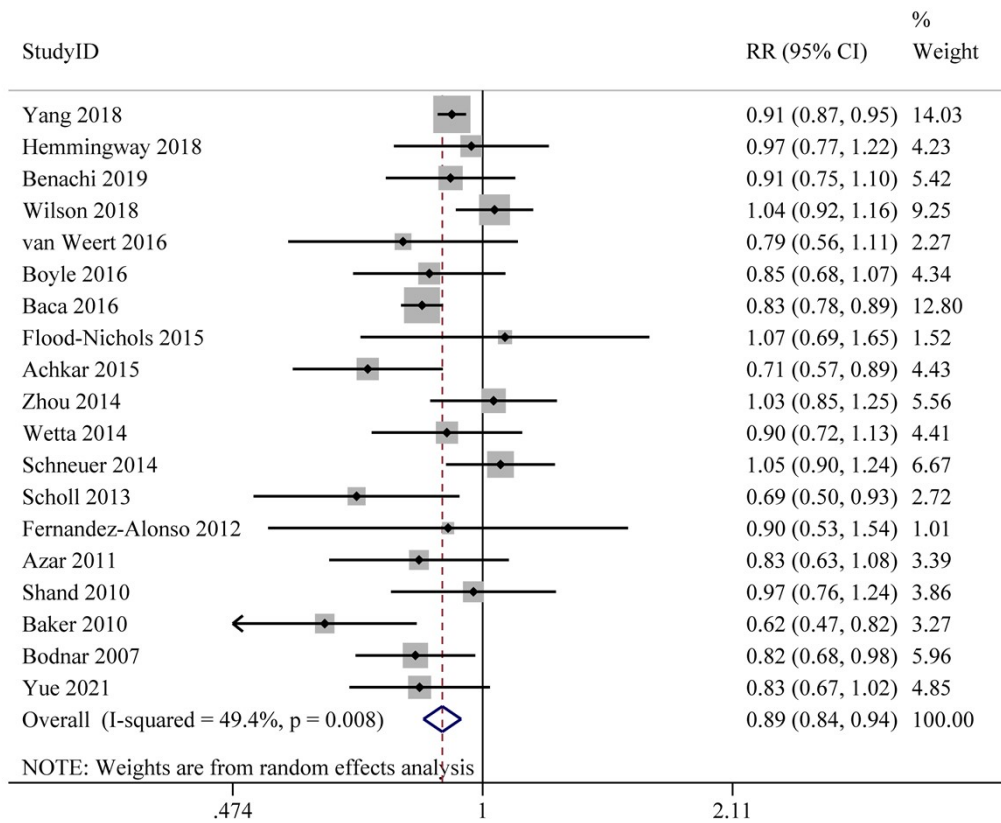

**Supplementary Figure S2. Linear dose-response meta-analysis of maternal 25(OH)D levels (per 25 nmol/L increase) and risk of PE. PE, pre-eclampsia.**

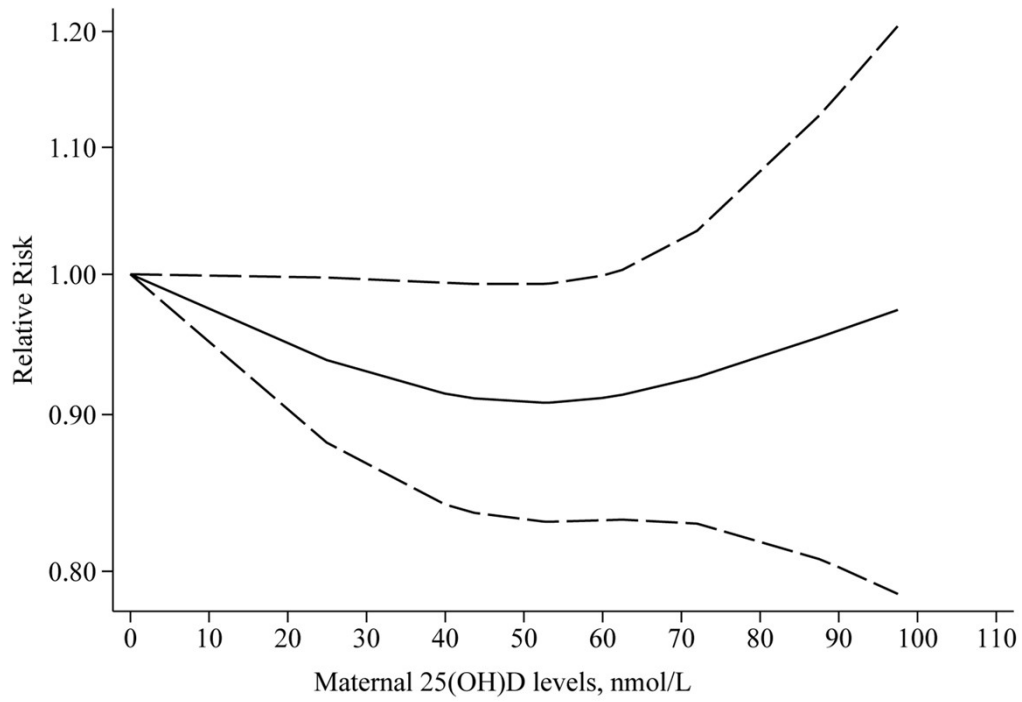

**Supplementary Figure S3. Non-linear dose-response meta-analysis of maternal 25(OH)D levels and risk of GH ( $P_{\text{non-linearity}} = 0.209$ ). GH, gestational hypertension.**

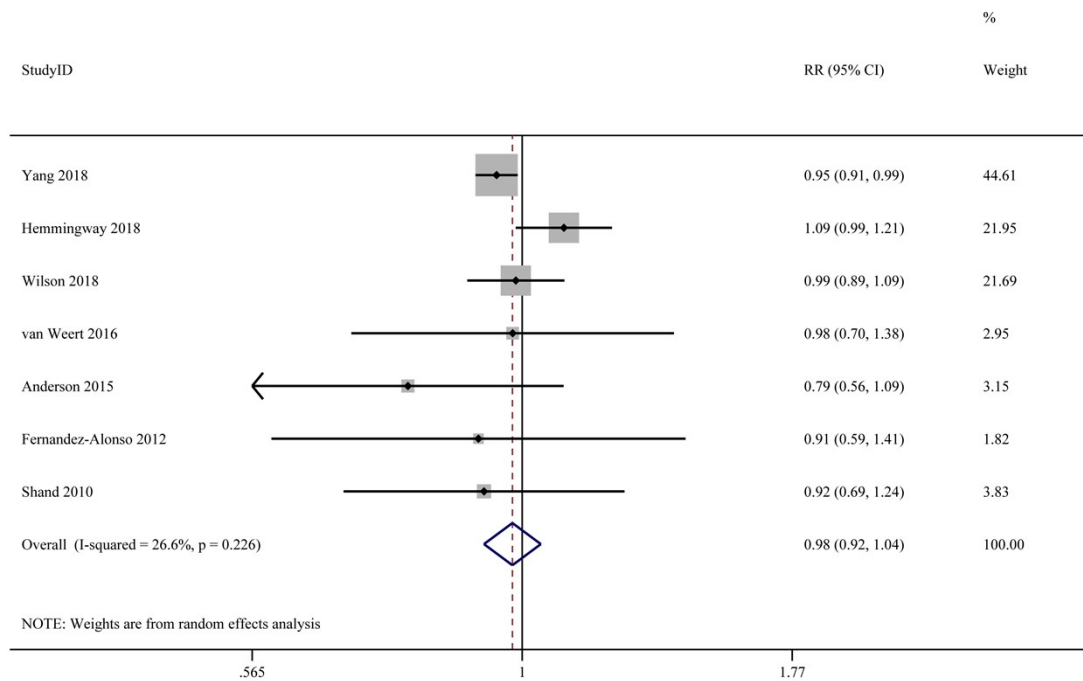

**Supplementary Figure S4. Linear dose-response meta-analysis of maternal 25(OH)D levels (per 25 nmol/L increase) and risk of GH. GH, gestational hypertension.**



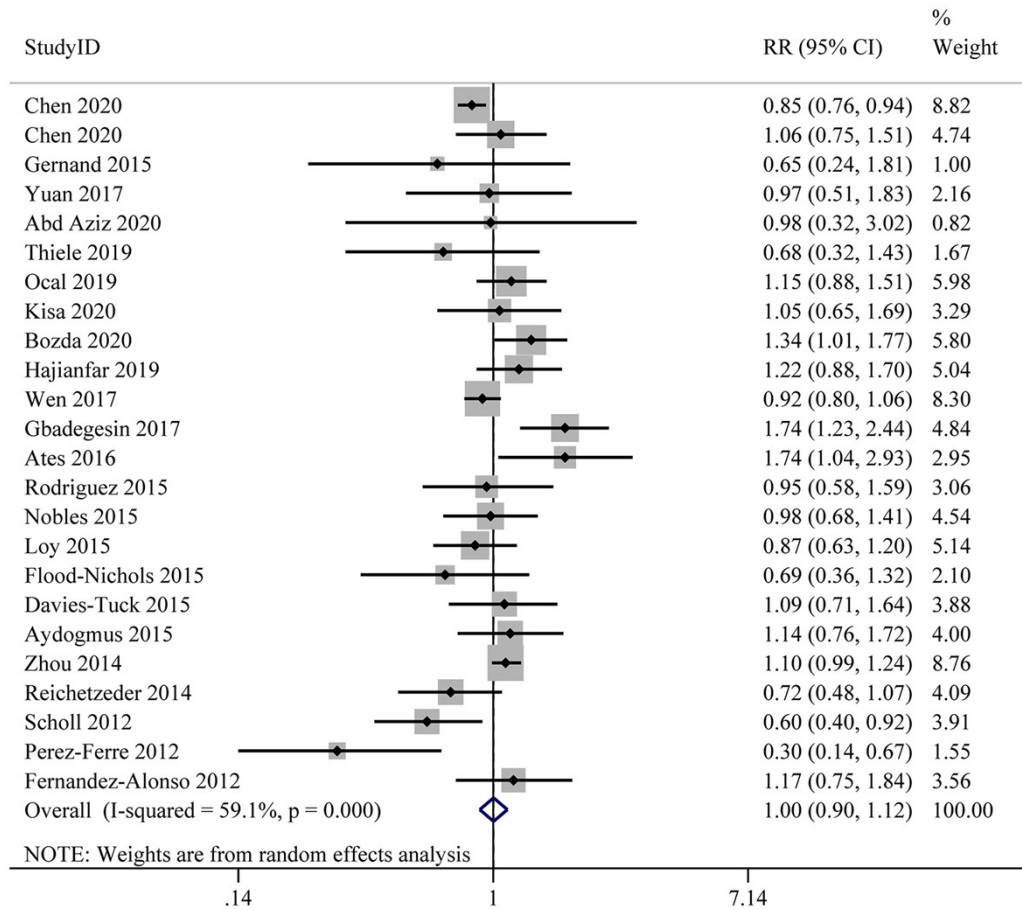

**Supplementary Figure S5. Maternal 25(OH)D levels and risk of C-section, the highest versus lowest category. C-section, caesarean section.**

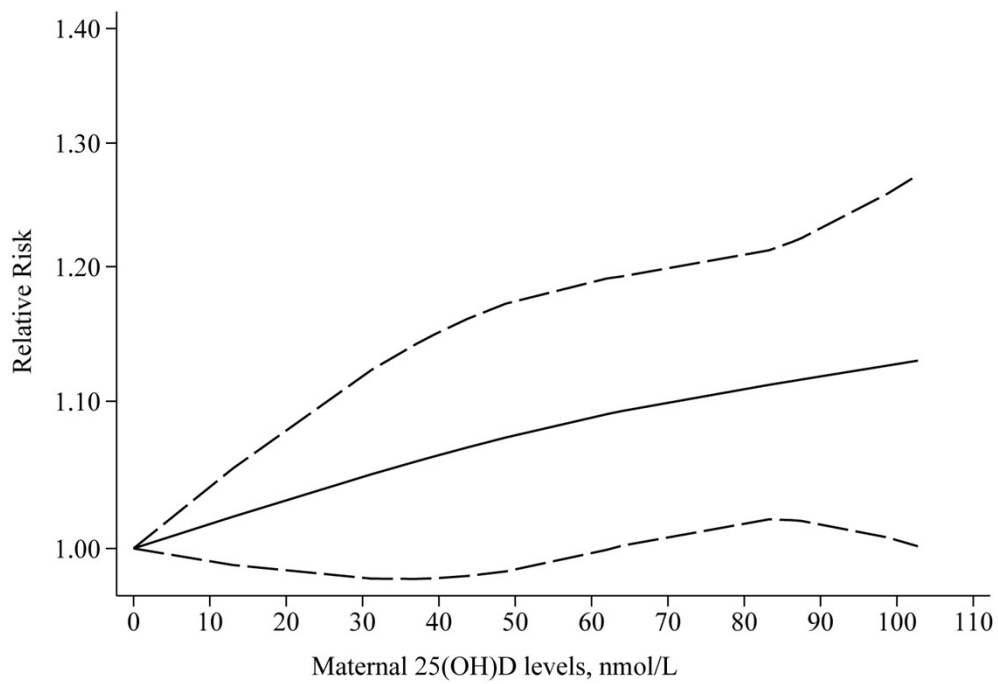

**Supplementary Figure S6. Non-linear dose-response meta-analysis of maternal 25(OH)D levels and risk of C-section ( $P_{\text{non-linearity}} = 0.773$ ). C-section, caesarean section.**

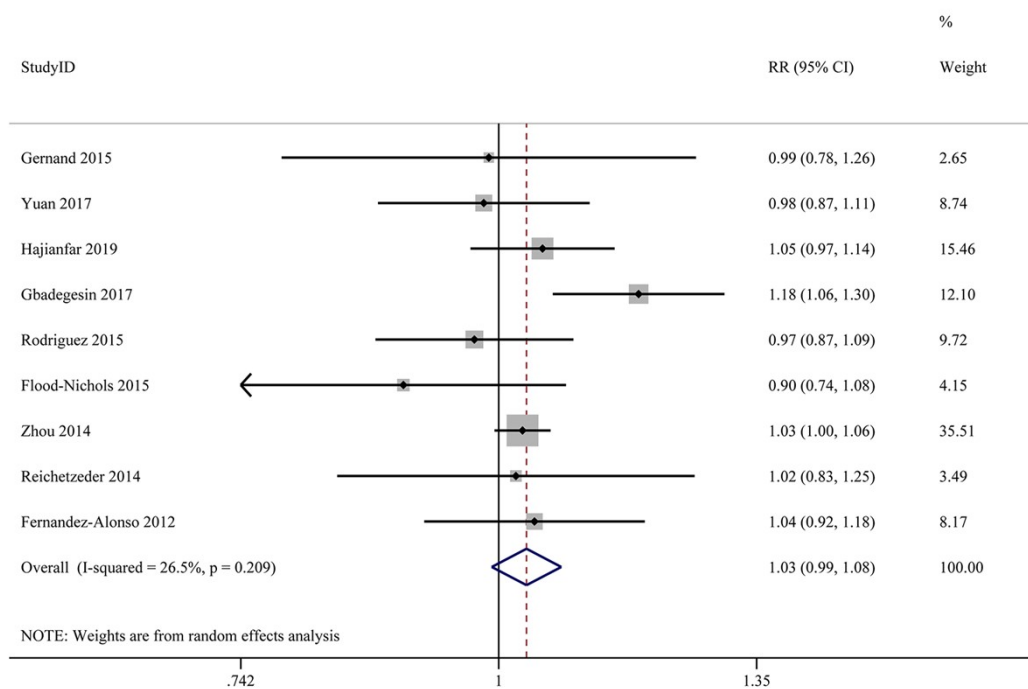

**Supplementary Figure S7. Linear dose-response meta-analysis of maternal 25(OH)D levels (per 25 nmol/L increase) and risk of C-section. C-section, caesarean section.**

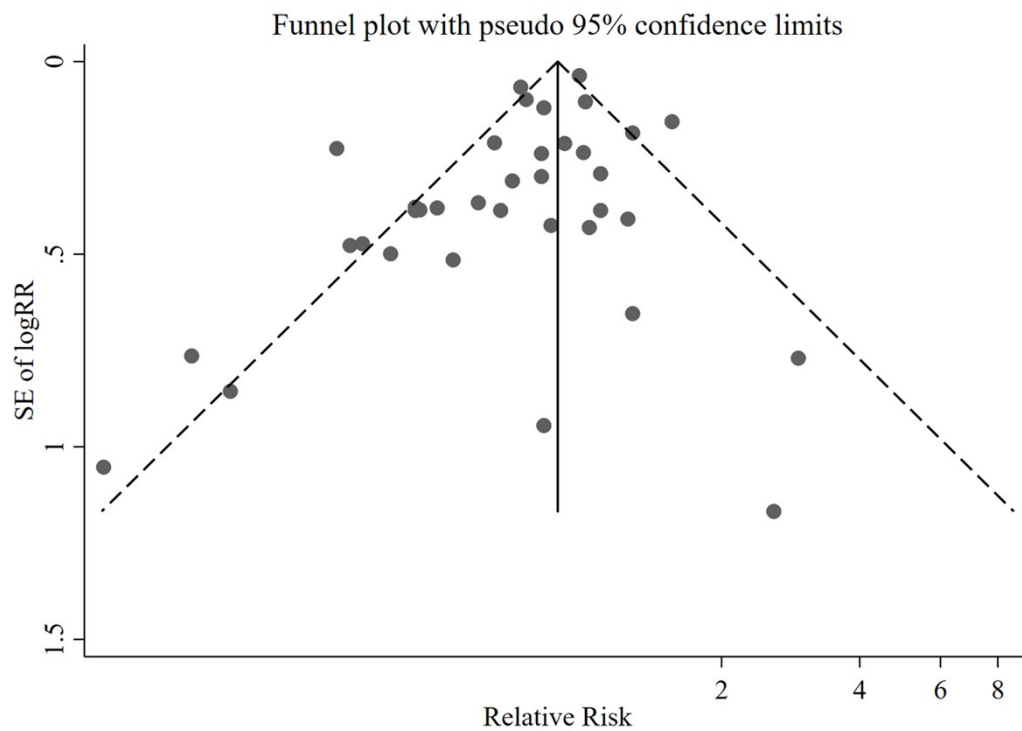

**Supplementary Figure S8. Funnel plot of the risk estimates for the association between maternal 25(OH)D levels and risk of GDM, the highest versus lowest category (Egger's test  $P = 0.016$ ). GDM, gestational diabetes mellitus.**

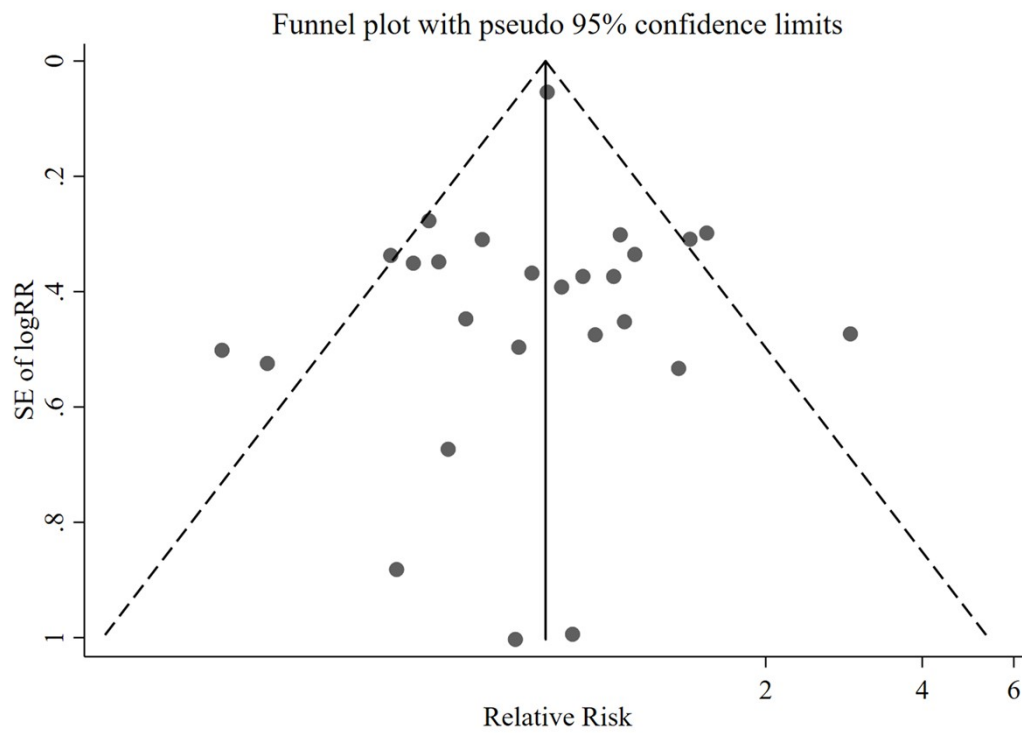

**Supplementary Figure S9. Funnel plot of the risk estimates for the association between maternal 25(OH)D levels and risk of PE, the highest versus lowest category (Egger's test  $P = 0.698$ ). PE, pre-eclampsia.**

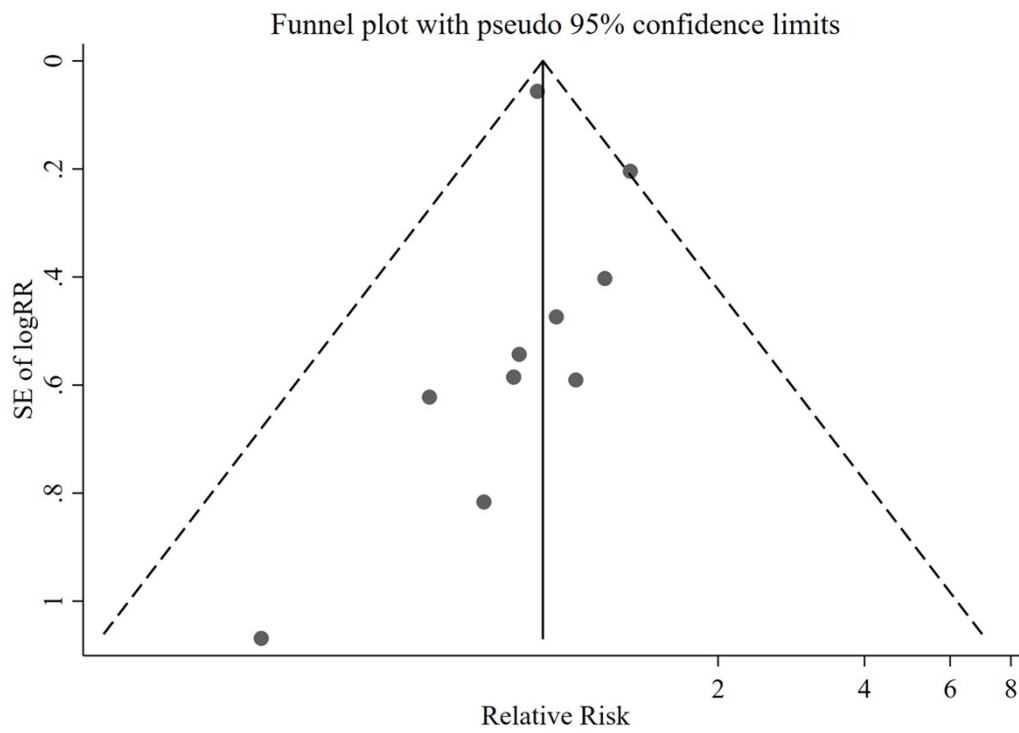

**Supplementary Figure S10. Funnel plot of the risk estimates for the association between maternal 25(OH)D levels and risk of GH, the highest versus lowest category (Egger's test  $P = 0.858$ ). GH, gestational hypertension.**

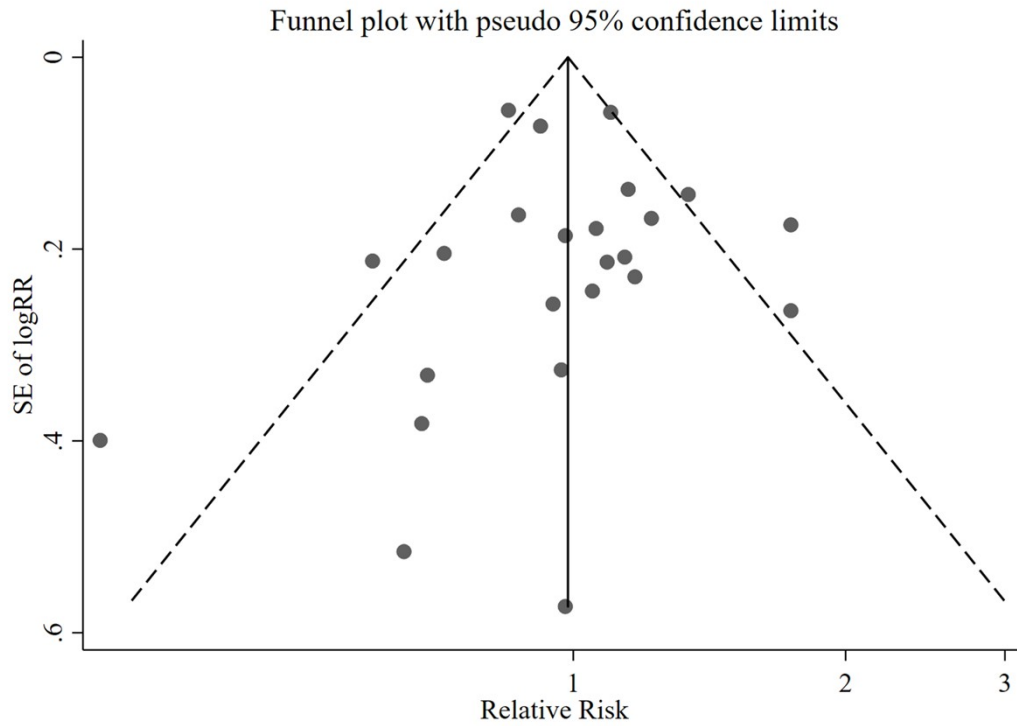

**Supplementary Figure S11. Funnel plot of the risk estimates for the association between maternal 25(OH)D levels and risk of C-section, the highest versus lowest category (Egger's test  $P = 0.983$ ). C-section, caesarean section.**
